# Supplementary material for: Curve Effect on Singlet Diradical Contribution in Kekulé-type Diradicals: A Sensitive Probe for Quinoidal Structure in Curved π-Conjugated Molecules
Source: PubMed Central journal article supplement (PMC6337420; doi:10.3390/molecules24010209), 2019-01-08
Supplement: molecules-24-00209-s001.pdf [file molecules-24-00209-s001.pdf]

## Curve Effect on Singlet Diradical Contribution in Kekulé-type Diradicals. A Sensitive Probe for Quinoidal Structure in Curved $\pi$ -Conjugated Molecules

Misaki Matsumoto<sup>1</sup>, Ivana Antol<sup>\*,2</sup> and Manabu Abe<sup>\*,1,3</sup>

<sup>1</sup>Department of Chemistry, Graduate School of Science, Hiroshima University, 1-3-1 Kagamiyama, Higashi-Hiroshima, Hiroshima 739-8526, Japan

<sup>2</sup>Laboratory for Physical Organic Chemistry, Division of Organic Chemistry and Biochemistry, Ruđer Bošković Institute, Bijenička cesta 54, 10000 Zagreb, Croatia

<sup>3</sup>Hiroshima University Research Center for Photo-Drug-Delivery Systems (HiU-P-DDS)

\*Correspondence: Ivana.Antol@irb.hr; mabe@hiroshima-u.ac.jp

### Contents:

1. Active orbitals for S-**DR1** structure at  $\theta = 0^\circ$  (Figure S1)
2. Natural orbital occupation numbers for the  $S_0$  state of S-**DR1** structures at different bent angles (Table S1)
3. Natural orbital occupation numbers for the  $T_1$  state of T-**DR1** structures at different bent angles (Table S2)
4. Weights of the leading configurations calculated by the CASSCF method for ground state singlet ( $1^1A$ ) state and triplet ( $1^3B$ ) state of **DR1** structures with different bent angles (Table S3)
5. Active orbitals for S-**DR2** structure at  $\theta = 0^\circ$  (Figure S2)
6. Natural orbital occupation numbers for the  $S_0$  state of S-**DR2** structures at different bent angles (Table S4)
7. Natural orbital occupation numbers for the  $T_1$  state of T-**DR2** structures at different bent angles (Table S5)
8. Weights of the leading configurations calculated by the CASSCF method for ground state singlet ( $1^1A$ ) state and triplet ( $1^3B$ ) state of **DR2** structures with different bent angles (Table S6)
9. Active orbitals for S-**DR3** structure at  $\theta = 0^\circ$  (Figure S3)
10. Natural orbital occupation numbers for the  $S_0$  state of S-**DR3** structures at different bent angles (Table S7)
11. Natural orbital occupation numbers for the  $T_1$  state of T-**DR3** structures at different bent angles (Table S8)
12. Weights of the leading configurations calculated by the CASSCF method for ground state singlet ( $1^1A'$ ) state and triplet ( $1^3A''$ ) state of **DR3** structures with different bent angles (Table S9)
13. Active orbitals for S-**DR4** structure at  $\theta = 0^\circ$  (Figure S4)
14. Natural orbital occupation numbers for the  $S_0$  state of S-**DR4** structures at different bent angles (Table S10)
15. Natural orbital occupation numbers for the  $T_1$  state of T-**DR4** structures at different bent angles (Table S11)
16. Weights of the leading configurations calculated by the CASSCF method for ground state singlet ( $1^1A$ ) state and triplet ( $1^3B$ ) state of **DR4** structures with different bent angles (Table S12)
17. Cartesian coordinates for **DR1-4**

DFT calculations have been done by Gaussian 09 (Revision D.01). MOLCAS 8 program package (v8.0.15-06-18) was used for the CASSCF and CASPT2 calculations.

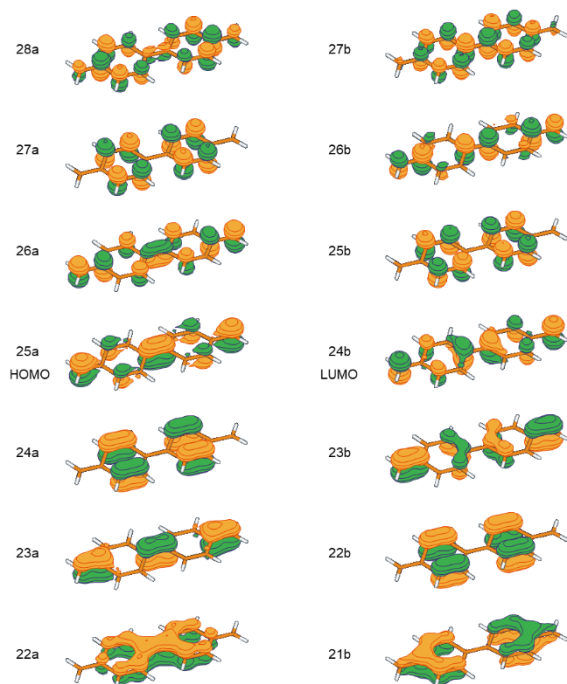

**Figure S1.** CASSCF active molecular orbitals for the S-DR1 structure at  $\theta = 0^\circ$ . The calculation was calculated using the  $C_2$  symmetry therefore the orbitals can be separated into a or b orbital symmetries.

**Table S1.** Natural orbital occupation numbers for active orbitals calculated for the  $S_0$  state of S-DR1 structures at different bent angles.

| Orbital                      | Bent angle $\theta$ (C1-C2-C6 = C5-C9-C10) / $^\circ$ |         |         |         |
|------------------------------|-------------------------------------------------------|---------|---------|---------|
|                              | 0(180)                                                | 13(160) | 25(140) | 29(135) |
| 22a                          | 1.956                                                 | 1.954   | 1.951   | 1.950   |
| 23a                          | 1.922                                                 | 1.922   | 1.920   | 1.918   |
| 24a                          | 1.905                                                 | 1.906   | 1.907   | 1.906   |
| 25a (HOMO, $\psi_{A\cdot}$ ) | 1.652                                                 | 1.702   | 1.786   | 1.799   |
| 26a                          | 0.130                                                 | 0.126   | 0.116   | 0.114   |
| 27a                          | 0.091                                                 | 0.090   | 0.088   | 0.088   |
| 28a                          | 0.047                                                 | 0.049   | 0.055   | 0.058   |
| 21b                          | 1.948                                                 | 1.946   | 1.941   | 1.939   |
| 22b                          | 1.908                                                 | 1.909   | 1.911   | 1.911   |
| 23b                          | 1.873                                                 | 1.877   | 1.886   | 1.887   |
| 24b (LUMO, $\psi_{R\cdot}$ ) | 0.358                                                 | 0.309   | 0.226   | 0.212   |
| 25b                          | 0.096                                                 | 0.095   | 0.093   | 0.093   |
| 26b                          | 0.076                                                 | 0.076   | 0.078   | 0.080   |
| 27b                          | 0.039                                                 | 0.040   | 0.044   | 0.045   |

**Table S2.** Natural orbital occupation numbers for active orbitals calculated for active orbitals calculated for the  $T_1$  state of T-DR1 structures at different bent angles

| Orbital | Bent angle $\theta$ (C1-C2-C6 = C5-C9-C10) / $^\circ$ |         |         |         |
|---------|-------------------------------------------------------|---------|---------|---------|
|         | 0(180)                                                | 13(160) | 25(140) | 29(135) |

|                       |       |       |       |       |
|-----------------------|-------|-------|-------|-------|
| 22a                   | 1.958 | 1.893 | 1.889 | 1.887 |
| 23a                   | 1.903 | 1.957 | 1.954 | 1.952 |
| 24a                   | 1.895 | 1.900 | 1.892 | 1.889 |
| 25a (SOMO, $\psi_A$ ) | 1.017 | 1.018 | 1.022 | 1.023 |
| 26a                   | 0.120 | 0.108 | 0.111 | 0.112 |
| 27a                   | 0.107 | 0.122 | 0.130 | 0.132 |
| 28a                   | 0.042 | 0.044 | 0.049 | 0.050 |
| 21b                   | 1.954 | 1.881 | 1.873 | 1.870 |
| 22b                   | 1.894 | 1.953 | 1.949 | 1.948 |
| 23b                   | 1.884 | 1.893 | 1.890 | 1.888 |
| 24b (SOMO, $\psi_R$ ) | 0.986 | 0.985 | 0.981 | 0.979 |
| 25b                   | 0.107 | 0.109 | 0.113 | 0.114 |
| 26b                   | 0.094 | 0.097 | 0.106 | 0.109 |
| 27b                   | 0.038 | 0.039 | 0.043 | 0.044 |

**Table S3.** Weights ( $w$ ) of the leading configurations calculated by the CASSCF method for ground state singlet ( $1^1A$ ) state and triplet ( $1^3B$ ) state of **DR1** structures with different bent angles

| Bent angle $\theta$ (C1-C2-C6 = C5-C9-C10) /° | Singlet ( $1^1A$ , gr. state, $S_0$ ) |                      | Triplet ( $1^3B$ , $T_1$ )     |
|-----------------------------------------------|---------------------------------------|----------------------|--------------------------------|
|                                               | $w(\dots(\psi_A)^2)$                  | $w(\dots(\psi_R)^2)$ | $w(\dots(\psi_A)^1(\psi_R)^1)$ |
| 0 (180)                                       | 0.63599                               | 0.08384              | 0.71232                        |
| 13 (160)                                      | 0.65805                               | 0.06517              | 0.70539                        |
| 25 (140)                                      | 0.69408                               | 0.0356               | 0.68387                        |
| 29 (135)                                      | 0.69866                               | 0.0311               | 0.6763                         |

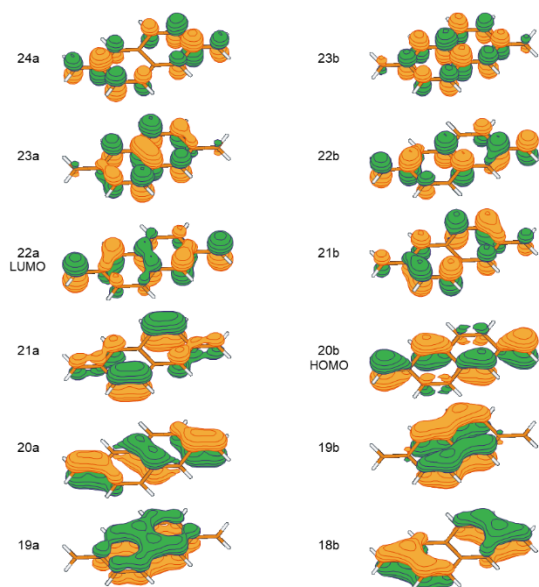

**Figure S2.** CASSCF active molecular orbitals for the **S-DR2** structure at  $\theta = 0^\circ$ .

**Table S4.** Natural orbital occupation numbers for active orbitals calculated for the  $S_0$  state of S-DR2 structures at different bent angles

| Orbital                      | Bent angle $\theta$ (C1-C2-C6 = C8-C7-C12) /° |          |          |          |
|------------------------------|-----------------------------------------------|----------|----------|----------|
|                              | 0 (180)                                       | 12 (160) | 17 (140) | 26 (120) |
| 19a                          | 1.956                                         | 1.954    | 1.951    | 1.946    |
| 20a                          | 1.911                                         | 1.910    | 1.908    | 1.904    |
| 21a                          | 1.884                                         | 1.885    | 1.888    | 1.892    |
| 22a (LUMO, $\psi_{R\cdot}$ ) | 0.241                                         | 0.228    | 0.195    | 0.157    |
| 23a                          | 0.073                                         | 0.074    | 0.076    | 0.080    |
| 24a                          | 0.055                                         | 0.057    | 0.063    | 0.071    |
| 18b                          | 1.940                                         | 1.939    | 1.934    | 1.928    |
| 19b                          | 1.925                                         | 1.925    | 1.922    | 1.917    |
| 20b (HOMO, $\psi_{A\cdot}$ ) | 1.770                                         | 1.783    | 1.816    | 1.852    |
| 21b                          | 0.117                                         | 0.116    | 0.113    | 0.107    |
| 22b                          | 0.089                                         | 0.089    | 0.091    | 0.094    |
| 23b                          | 0.038                                         | 0.039    | 0.044    | 0.051    |

**Table S5.** Natural orbital occupation numbers for active orbitals calculated for the  $T_1$  state of T-DR2 structures at different bent angles

| Orbital                      | Bent angle $\theta$ (C1-C2-C6 = C8-C7-C12) /° |          |          |          |
|------------------------------|-----------------------------------------------|----------|----------|----------|
|                              | 0 (180)                                       | 17 (160) | 34 (140) | 52 (120) |
| 19a                          | 1.960                                         | 1.959    | 1.956    | 1.951    |
| 20a                          | 1.894                                         | 1.891    | 1.881    | 1.863    |
| 21a                          | 1.855                                         | 1.854    | 1.850    | 1.843    |
| 22a (SOMO, $\psi_{R\cdot}$ ) | 0.966                                         | 0.964    | 0.957    | 0.940    |
| 23a                          | 0.088                                         | 0.090    | 0.095    | 0.108    |
| 24a                          | 0.057                                         | 0.058    | 0.064    | 0.073    |
| 18b                          | 1.940                                         | 1.939    | 1.934    | 1.927    |
| 19b                          | 1.911                                         | 1.909    | 1.904    | 1.892    |
| 20b (SOMO, $\psi_{A\cdot}$ ) | 1.037                                         | 1.039    | 1.046    | 1.060    |
| 21b                          | 0.150                                         | 0.151    | 0.153    | 0.158    |
| 22b                          | 0.107                                         | 0.110    | 0.121    | 0.140    |
| 23b                          | 0.035                                         | 0.036    | 0.039    | 0.046    |

**Table S6.** Weights ( $w$ ) of the leading configurations calculated by the CASSCF method for ground state singlet ( $1^1A$ ) state and triplet ( $1^3B$ ) state of DR2 structures with different bent angles

| Bent angle $\theta$ (C1-C2-C6 = C8-C7-C12) /° | Singlet ( $1^1A$ , gr. state, $S_0$ ) |                             | Triplet ( $1^3B$ , $T_1$ )                   |
|-----------------------------------------------|---------------------------------------|-----------------------------|----------------------------------------------|
|                                               | $w(\dots(\psi_{A\cdot})^2)$           | $w(\dots(\psi_{R\cdot})^2)$ | $w(\dots(\psi_{A\cdot})^1(\psi_{R\cdot})^1)$ |
| 0 (180)                                       | 0.72420                               | 0.04872                     | 0.74879                                      |
| 17 (160)                                      | 0.72546                               | 0.04726                     | 0.74337                                      |
| 34 (140)                                      | 0.72869                               | 0.04317                     | 0.7252                                       |
| 52 (120)                                      | 0.73358                               | 0.03696                     | 0.69058                                      |

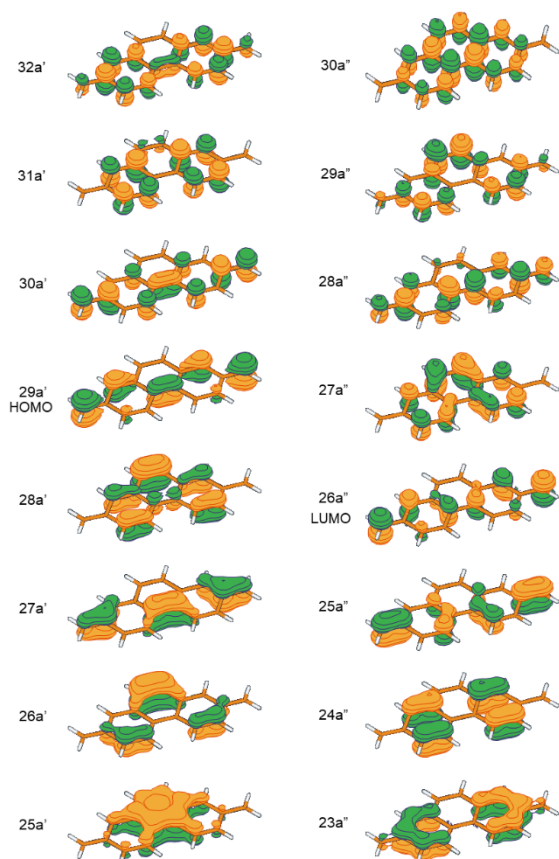

**Figure S3.** CASSCF active molecular orbitals for the S-DR3 structure at  $\theta = 0^\circ$ . The calculation was calculated using the  $C_s$  symmetry therefore the orbitals can be separated into a' or a'' orbital symmetries.

**Table S7.** Natural orbital occupation numbers for active orbitals calculated for the  $S_0$  state of S-DR3 structures at different bent angles

| Orbital                    | Bent angle $\theta$ (C1-C5-C6 = C10-C6-C5) / $^\circ$ |          |          |          |
|----------------------------|-------------------------------------------------------|----------|----------|----------|
|                            | 0 (180)                                               | 17 (160) | 34 (140) | 52 (120) |
| 25a'                       | 1.960                                                 | 1.958    | 1.953    | 1.994    |
| 26a'                       | 1.935                                                 | 1.934    | 1.931    | 1.939    |
| 27a'                       | 1.922                                                 | 1.921    | 1.919    | 1.927    |
| 28a'                       | 1.868                                                 | 1.871    | 1.883    | 1.901    |
| 29a' (HOMO, $\psi_{A'}$ )  | 1.580                                                 | 1.622    | 1.759    | 1.868    |
| 30a'                       | 0.128                                                 | 0.127    | 0.118    | 0.108    |
| 31a'                       | 0.091                                                 | 0.092    | 0.091    | 0.089    |
| 32a'                       | 0.046                                                 | 0.048    | 0.051    | 0.056    |
| 23a''                      | 1.949                                                 | 1.948    | 1.944    | 1.940    |
| 24a''                      | 1.909                                                 | 1.909    | 1.909    | 1.908    |
| 25a''                      | 1.874                                                 | 1.875    | 1.883    | 1.893    |
| 26a'' (LUMO, $\psi_{R'}$ ) | 0.429                                                 | 0.388    | 0.254    | 0.142    |
| 27a''                      | 0.134                                                 | 0.131    | 0.117    | 0.098    |
| 28a''                      | 0.077                                                 | 0.078    | 0.079    | 0.071    |
| 29a''                      | 0.062                                                 | 0.063    | 0.066    | 0.059    |
| 30a''                      | 0.034                                                 | 0.036    | 0.043    | 0.006    |

**Table S8.** Natural orbital occupation numbers for active orbitals calculated for the T<sub>1</sub> state of T-DR3 structures at different bent angles

| Orbital                     | Bent angle $\theta$ (C1-C5-C6 = C10-C6-C5) /° |          |          |          |
|-----------------------------|-----------------------------------------------|----------|----------|----------|
|                             | 0 (180)                                       | 17 (160) | 34 (140) | 52 (120) |
| 25a'                        | 1.963                                         | 1.961    | 1.958    | 1.951    |
| 26a'                        | 1.935                                         | 1.934    | 1.931    | 1.926    |
| 27a'                        | 1.911                                         | 1.909    | 1.901    | 1.888    |
| 28a'                        | 1.857                                         | 1.858    | 1.860    | 1.864    |
| 29a' (SOMO, $\psi_{A'}$ )   | 1.027                                         | 1.028    | 1.032    | 1.039    |
| 30a'                        | 0.125                                         | 0.127    | 0.132    | 0.141    |
| 31a'                        | 0.100                                         | 0.102    | 0.107    | 0.117    |
| 32a'                        | 0.044                                         | 0.045    | 0.048    | 0.054    |
| 23a''                       | 1.952                                         | 1.952    | 1.949    | 1.942    |
| 24a''                       | 1.901                                         | 1.899    | 1.894    | 1.885    |
| 25a''                       | 1.879                                         | 1.877    | 1.869    | 1.856    |
| 26a'' (SOMO, $\psi_{B''}$ ) | 0.977                                         | 0.976    | 0.972    | 0.964    |
| 27a''                       | 0.148                                         | 0.146    | 0.142    | 0.138    |
| 28a''                       | 0.087                                         | 0.090    | 0.100    | 0.116    |
| 29a''                       | 0.062                                         | 0.063    | 0.066    | 0.072    |
| 30a''                       | 0.032                                         | 0.034    | 0.039    | 0.049    |

**Table S9.** Weights ( $w$ ) of the leading configurations calculated by the CASSCF method for ground state singlet ( $1^1A'$ ) state and triplet ( $1^3A''$ ) state of DR3 structures with different bent angles

| Bent angle $\theta$ (C1-C5-C6 = C10-C6-C5) /° | Singlet ( $1^1A'$ , gr. state, S <sub>0</sub> ) |                          | Triplet ( $1^3A''$ , T <sub>1</sub> ) |
|-----------------------------------------------|-------------------------------------------------|--------------------------|---------------------------------------|
|                                               | $w(\dots(\psi_{A'})^2)$                         | $w(\dots(\psi_{B''})^2)$ | $w(\dots(\psi_{A'})^1(\psi_{B''})^1)$ |
| 0 (180)                                       | 0.5760                                          | 0.1048                   | 0.68240                               |
| 17 (160)                                      | 0.5926                                          | 0.0884                   | 0.67713                               |
| 34 (140)                                      | 0.6506                                          | 0.0396                   | 0.65991                               |
| 52 (120)                                      | 0.7238                                          | -                        | 0.62888                               |

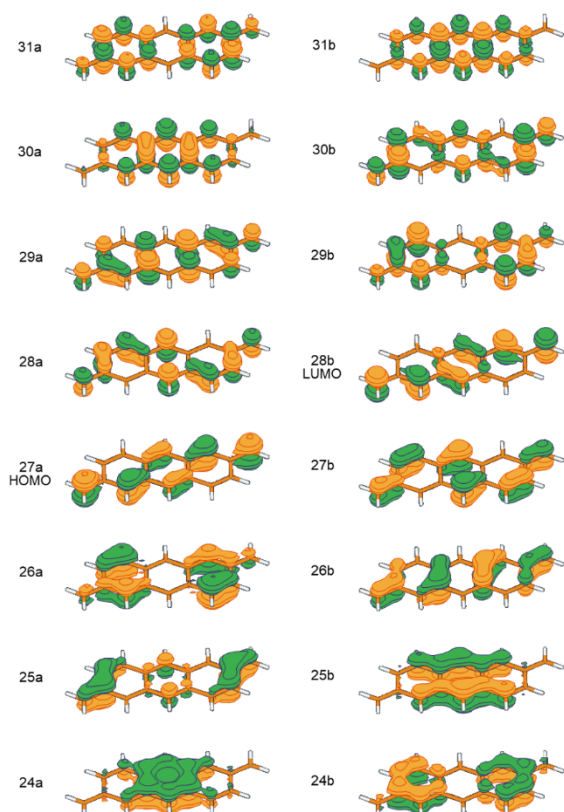

**Figure S4.** CASSCF active molecular orbitals for the S-DR4 structure at  $\theta = 0^\circ$ .

**Table S10.** Natural orbital occupation numbers for active orbitals calculated for the  $S_0$  state of S-DR4 structures at different bent angles

| Orbital                        | Bent angle $\theta$ (C1-C5-C6 = C10-C13-C14) / $^\circ$ |          |          |          |
|--------------------------------|---------------------------------------------------------|----------|----------|----------|
|                                | 0 (180)                                                 | 12 (160) | 24 (140) | 35 (120) |
| 24a                            | 1.959                                                   | 1.958    | 1.953    | 1.947    |
| 25a                            | 1.930                                                   | 1.930    | 1.929    | 1.925    |
| 26a                            | 1.904                                                   | 1.904    | 1.905    | 1.905    |
| 27a (HOMO, $\psi_{\Delta^+}$ ) | 1.654                                                   | 1.680    | 1.762    | 1.816    |
| 28a                            | 0.159                                                   | 0.155    | 0.140    | 0.127    |
| 29a                            | 0.104                                                   | 0.104    | 0.103    | 0.109    |
| 30a                            | 0.070                                                   | 0.071    | 0.074    | 0.078    |
| 31a                            | 0.046                                                   | 0.047    | 0.050    | 0.055    |
| 24b                            | 1.948                                                   | 1.948    | 1.945    | 1.941    |
| 25b                            | 1.929                                                   | 1.928    | 1.925    | 1.918    |
| 26b                            | 1.897                                                   | 1.897    | 1.897    | 1.893    |
| 27b                            | 1.844                                                   | 1.848    | 1.861    | 1.872    |
| 28b (LUMO, $\psi_{R^+}$ )      | 0.357                                                   | 0.332    | 0.251    | 0.195    |
| 29b                            | 0.095                                                   | 0.095    | 0.094    | 0.095    |
| 30b                            | 0.067                                                   | 0.067    | 0.068    | 0.072    |
| 31b                            | 0.035                                                   | 0.036    | 0.042    | 0.050    |

**Table S11.** Natural orbital occupation numbers for the T<sub>1</sub> state of T-DR4 structures at different bent angles

| Orbital                      | Bent angle $\theta$ (C1-C5-C6 = C10-C13-C14) /° |          |          |          |
|------------------------------|-------------------------------------------------|----------|----------|----------|
|                              | 0 (180)                                         | 12 (160) | 24 (140) | 35 (120) |
| 24a                          | 1.963                                           | 1.962    | 1.959    | 1.953    |
| 25a                          | 1.930                                           | 1.929    | 1.927    | 1.924    |
| 26a                          | 1.892                                           | 1.891    | 1.888    | 1.883    |
| 27a (SOMO, $\psi_{A\cdot}$ ) | 1.035                                           | 1.036    | 1.041    | 1.050    |
| 28a                          | 0.182                                           | 0.181    | 0.179    | 0.176    |
| 29a                          | 0.112                                           | 0.115    | 0.123    | 0.142    |
| 30a                          | 0.078                                           | 0.079    | 0.084    | 0.092    |
| 31a                          | 0.046                                           | 0.047    | 0.051    | 0.057    |
| 24b                          | 1.949                                           | 1.948    | 1.945    | 1.940    |
| 25b                          | 1.922                                           | 1.920    | 1.916    | 1.908    |
| 26b                          | 1.890                                           | 1.887    | 1.878    | 1.860    |
| 27b                          | 1.825                                           | 1.825    | 1.825    | 1.826    |
| 28b (SOMO, $\psi_{R\cdot}$ ) | 0.969                                           | 0.967    | 0.963    | 0.953    |
| 29b                          | 0.108                                           | 0.110    | 0.113    | 0.118    |
| 30b                          | 0.068                                           | 0.069    | 0.071    | 0.074    |
| 31b                          | 0.032                                           | 0.033    | 0.037    | 0.045    |

**Table S12.** Weights ( $w$ ) of the leading configurations calculated by the CASSCF method for ground state singlet ( $1^1A$ ) state and triplet ( $1^3B$ ) state of DR4 structures with different bent angles

| Bent angle $\theta$ (C1-C5-C6 = C10-C13-C14) /° | Singlet ( $1^1A$ , gr. state, $S_0$ ) |                      | Triplet ( $1^3B$ , $T_1$ )     |
|-------------------------------------------------|---------------------------------------|----------------------|--------------------------------|
|                                                 | $w(\dots(\psi_A)^2)$                  | $w(\dots(\psi_R)^2)$ | $w(\dots(\psi_A)^1(\psi_R)^1)$ |
| 0 (180)                                         | 0.60455                               | 0.07488              | 0.66384                        |
| 12 (160)                                        | 0.61484                               | 0.06542              | 0.65972                        |
| 24 (140)                                        | 0.64938                               | 0.03727              | 0.64668                        |
| 35 (120)                                        | 0.66686                               | 0.01884              | 0.62363                        |



**S-DR1 at  $\theta = 0^\circ$  (C1-C2-C6 = C5-C9-C10 =  $180^\circ$ )**

Standard orientation:

| Center Number | Atomic Number | Atomic Type | Coordinates (Angstroms) |           |           |
|---------------|---------------|-------------|-------------------------|-----------|-----------|
|               |               |             | X                       | Y         | Z         |
| 1             | 1             | 0           | -0.161861               | 0.969752  | 2.164907  |
| 2             | 6             | 0           | -0.078652               | 1.482307  | 1.213291  |
| 3             | 6             | 0           | 0.082629                | 2.847531  | -1.218371 |
| 4             | 6             | 0           | 0.000000                | 0.715202  | -0.000003 |
| 5             | 6             | 0           | -0.082619               | 2.847527  | 1.218371  |
| 6             | 6             | 0           | 0.000000                | 3.616545  | 0.000001  |
| 7             | 6             | 0           | 0.078659                | 1.482311  | -1.213296 |
| 8             | 1             | 0           | -0.155369               | 3.383575  | 2.161662  |
| 9             | 1             | 0           | 0.161868                | 0.969759  | -2.164912 |
| 10            | 1             | 0           | 0.155387                | 3.383583  | -2.161660 |
| 11            | 6             | 0           | 0.000000                | -0.715202 | -0.000003 |
| 12            | 6             | 0           | 0.000000                | -3.616545 | 0.000001  |
| 13            | 6             | 0           | 0.078652                | -1.482307 | 1.213291  |
| 14            | 6             | 0           | -0.078659               | -1.482311 | -1.213296 |
| 15            | 6             | 0           | -0.082629               | -2.847531 | -1.218371 |
| 16            | 6             | 0           | 0.082619                | -2.847527 | 1.218371  |
| 17            | 1             | 0           | 0.161861                | -0.969752 | 2.164907  |
| 18            | 1             | 0           | -0.161868               | -0.969759 | -2.164912 |
| 19            | 1             | 0           | -0.155387               | -3.383583 | -2.161660 |
| 20            | 1             | 0           | 0.155369                | -3.383575 | 2.161662  |
| 21            | 6             | 0           | -0.000008               | -4.990477 | 0.000004  |
| 22            | 1             | 0           | 0.063355                | -5.556354 | 0.924407  |
| 23            | 6             | 0           | 0.000008                | 4.990477  | 0.000004  |
| 24            | 1             | 0           | 0.063388                | 5.556360  | -0.924394 |
| 25            | 1             | 0           | -0.063355               | 5.556354  | 0.924407  |
| 26            | 1             | 0           | -0.063388               | -5.556360 | -0.924394 |

**T-DR1 at  $\theta = 0^\circ$  (C1-C2-C6 = C5-C9-C10 =  $180^\circ$ )**

Standard orientation:

| Center Number | Atomic Number | Atomic Type | Coordinates (Angstroms) |           |           |
|---------------|---------------|-------------|-------------------------|-----------|-----------|
|               |               |             | X                       | Y         | Z         |
| 1             | 1             | 0           | -0.727358               | 2.025164  | 0.934885  |
| 2             | 6             | 0           | -0.394406               | 1.140882  | 1.471467  |
| 3             | 6             | 0           | 0.395801                | -1.146735 | 2.855700  |
| 4             | 6             | 0           | 0.000000                | 0.000000  | 0.741234  |
| 5             | 6             | 0           | -0.395801               | 1.146735  | 2.855700  |
| 6             | 6             | 0           | 0.000000                | 0.000000  | 3.603213  |
| 7             | 6             | 0           | 0.394406                | -1.140882 | 1.471467  |
| 8             | 1             | 0           | -0.712728               | 2.038076  | 3.391724  |
| 9             | 1             | 0           | 0.727358                | -2.025164 | 0.934885  |
| 10            | 1             | 0           | 0.712728                | -2.038076 | 3.391724  |
| 11            | 6             | 0           | 0.000000                | 0.000000  | -0.741234 |
| 12            | 6             | 0           | 0.000000                | 0.000000  | -3.603213 |
| 13            | 6             | 0           | 0.394406                | 1.140882  | -1.471467 |
| 14            | 6             | 0           | -0.394406               | -1.140882 | -1.471467 |
| 15            | 6             | 0           | -0.395801               | -1.146735 | -2.855700 |
| 16            | 6             | 0           | 0.395801                | 1.146735  | -2.855700 |
| 17            | 1             | 0           | 0.727358                | 2.025164  | -0.934885 |
| 18            | 1             | 0           | -0.727358               | -2.025164 | -0.934885 |
| 19            | 1             | 0           | -0.712728               | -2.038076 | -3.391724 |
| 20            | 1             | 0           | 0.712728                | 2.038076  | -3.391724 |
| 21            | 6             | 0           | 0.000000                | 0.000000  | -5.011499 |
| 22            | 1             | 0           | 0.299878                | 0.878412  | -5.573516 |
| 23            | 6             | 0           | 0.000000                | 0.000000  | 5.011499  |
| 24            | 1             | 0           | 0.299878                | -0.878412 | 5.573516  |
| 25            | 1             | 0           | -0.299878               | 0.878412  | 5.573516  |
| 26            | 1             | 0           | -0.299878               | -0.878412 | -5.573516 |

**S-DR1 at  $\theta = 13^\circ$  (C1-C2-C6 = C5-C9-C10 =  $160^\circ$ )**  
Standard orientation:

| Center Number | Atomic Number | Atomic Type | Coordinates (Angstroms) |           |           |
|---------------|---------------|-------------|-------------------------|-----------|-----------|
|               |               |             | X                       | Y         | Z         |
| 1             | 1             | 0           | -2.172772               | 0.980219  | 0.396710  |
| 2             | 6             | 0           | -1.218634               | 1.483358  | 0.288890  |
| 3             | 6             | 0           | 1.224332                | 2.829578  | 0.085619  |
| 4             | 6             | 0           | 0.000007                | 0.709970  | 0.317790  |
| 5             | 6             | 0           | -1.224349               | 2.829553  | 0.085789  |
| 6             | 6             | 0           | -0.000035               | 3.570832  | -0.140239 |
| 7             | 6             | 0           | 1.218626                | 1.483420  | 0.288937  |
| 8             | 1             | 0           | -2.169406               | 3.363617  | 0.021804  |
| 9             | 1             | 0           | 2.172776                | 0.980434  | 0.397394  |
| 10            | 1             | 0           | 2.169313                | 3.363755  | 0.021625  |
| 11            | 6             | 0           | -0.000007               | -0.709970 | 0.317790  |
| 12            | 6             | 0           | 0.000035                | -3.570832 | -0.140239 |
| 13            | 6             | 0           | -1.218626               | -1.483420 | 0.288937  |
| 14            | 6             | 0           | 1.218634                | -1.483358 | 0.288890  |
| 15            | 6             | 0           | 1.224349                | -2.829553 | 0.085789  |
| 16            | 6             | 0           | -1.224332               | -2.829578 | 0.085619  |
| 17            | 1             | 0           | -2.172776               | -0.980434 | 0.397394  |
| 18            | 1             | 0           | 2.172772                | -0.980219 | 0.396710  |
| 19            | 1             | 0           | 2.169406                | -3.363617 | 0.021804  |
| 20            | 1             | 0           | -2.169313               | -3.363755 | 0.021625  |
| 21            | 6             | 0           | 0.000007                | -4.799619 | -0.740138 |
| 22            | 1             | 0           | -0.926361               | -5.313623 | -0.978755 |
| 23            | 6             | 0           | -0.000007               | 4.799619  | -0.740138 |
| 24            | 1             | 0           | 0.926361                | 5.313623  | -0.978755 |
| 25            | 1             | 0           | -0.926286               | 5.313812  | -0.978670 |
| 26            | 1             | 0           | 0.926286                | -5.313812 | -0.978670 |

**T-DR1 at  $\theta = 13^\circ$  (C1-C2-C6 = C5-C9-C10 =  $160^\circ$ )**  
Standard orientation:

| Center Number | Atomic Number | Atomic Type | Coordinates (Angstroms) |           |           |
|---------------|---------------|-------------|-------------------------|-----------|-----------|
|               |               |             | X                       | Y         | Z         |
| 1             | 1             | 0           | -1.964028               | 1.054021  | 1.045702  |
| 2             | 6             | 0           | -1.074489               | 1.534844  | 0.647375  |
| 3             | 6             | 0           | 1.226981                | 2.779028  | -0.315595 |
| 4             | 6             | 0           | 0.037207                | 0.740705  | 0.291944  |
| 5             | 6             | 0           | -1.066697               | 2.907409  | 0.469589  |
| 6             | 6             | 0           | 0.061139                | 3.572089  | -0.097987 |
| 7             | 6             | 0           | 1.205698                | 1.406686  | -0.134965 |
| 8             | 1             | 0           | -1.958659               | 3.486700  | 0.695792  |
| 9             | 1             | 0           | 2.083739                | 0.822932  | -0.397413 |
| 10            | 1             | 0           | 2.117445                | 3.255808  | -0.718120 |
| 11            | 6             | 0           | -0.037207               | -0.740705 | 0.291944  |
| 12            | 6             | 0           | -0.061139               | -3.572089 | -0.097987 |
| 13            | 6             | 0           | -1.205698               | -1.406686 | -0.134965 |
| 14            | 6             | 0           | 1.074489                | -1.534844 | 0.647375  |
| 15            | 6             | 0           | 1.066697                | -2.907409 | 0.469589  |
| 16            | 6             | 0           | -1.226981               | -2.779028 | -0.315595 |
| 17            | 1             | 0           | -2.083739               | -0.822932 | -0.397413 |
| 18            | 1             | 0           | 1.964028                | -1.054021 | 1.045702  |
| 19            | 1             | 0           | 1.958659                | -3.486700 | 0.695792  |
| 20            | 1             | 0           | -2.117445               | -3.255808 | -0.718120 |
| 21            | 6             | 0           | 0.061139                | -4.852228 | -0.670152 |
| 22            | 1             | 0           | -0.773625               | -5.321748 | -1.180522 |
| 23            | 6             | 0           | -0.061139               | 4.852228  | -0.670152 |
| 24            | 1             | 0           | 0.773625                | 5.321748  | -1.180522 |
| 25            | 1             | 0           | -0.982451               | 5.419666  | -0.586700 |
| 26            | 1             | 0           | 0.982451                | -5.419666 | -0.586700 |

**S-DR1 at  $\theta = 25^\circ$  (C1-C2-C6 = C5-C9-C10 =  $140^\circ$ )**

Standard orientation:

| Center Number | Atomic Number | Atomic Type | Coordinates (Angstroms) |           |           |
|---------------|---------------|-------------|-------------------------|-----------|-----------|
|               |               |             | X                       | Y         | Z         |
| 1             | 1             | 0           | 2.170654                | 1.009522  | -0.805018 |
| 2             | 6             | 0           | 1.225658                | 1.483256  | -0.561575 |
| 3             | 6             | 0           | -1.231914               | 2.772395  | -0.147689 |
| 4             | 6             | 0           | -0.000041               | 0.699181  | -0.614957 |
| 5             | 6             | 0           | 1.231837                | 2.772471  | -0.147950 |
| 6             | 6             | 0           | -0.000009               | 3.411304  | 0.314101  |
| 7             | 6             | 0           | -1.225754               | 1.483166  | -0.561297 |
| 8             | 1             | 0           | 2.170073                | 3.311650  | -0.042033 |
| 9             | 1             | 0           | -2.170801               | 1.009397  | -0.804486 |
| 10            | 1             | 0           | -2.170163               | 3.311501  | -0.041504 |
| 11            | 6             | 0           | 0.000041                | -0.699181 | -0.614957 |
| 12            | 6             | 0           | 0.000009                | -3.411304 | 0.314101  |
| 13            | 6             | 0           | 1.225754                | -1.483166 | -0.561297 |
| 14            | 6             | 0           | -1.225658               | -1.483256 | -0.561575 |
| 15            | 6             | 0           | -1.231837               | -2.772471 | -0.147950 |
| 16            | 6             | 0           | 1.231914                | -2.772395 | -0.147689 |
| 17            | 1             | 0           | 2.170801                | -1.009397 | -0.804486 |
| 18            | 1             | 0           | -2.170654               | -1.009522 | -0.805018 |
| 19            | 1             | 0           | -2.170073               | -3.311650 | -0.042033 |
| 20            | 1             | 0           | 2.170163                | -3.311501 | -0.041504 |
| 21            | 6             | 0           | -0.000009               | -4.234508 | 1.391478  |
| 22            | 1             | 0           | 0.925938                | -4.596067 | 1.830221  |
| 23            | 6             | 0           | 0.000009                | 4.234508  | 1.391478  |
| 24            | 1             | 0           | -0.925938               | 4.596067  | 1.830221  |
| 25            | 1             | 0           | 0.925938                | 4.596197  | 1.830154  |
| 26            | 1             | 0           | -0.925938               | -4.596197 | 1.830154  |

**T-DR1 at  $\theta = 25^\circ$  (C1-C2-C6 = C5-C9-C10 =  $140^\circ$ )**

Standard orientation:

| Center Number | Atomic Number | Atomic Type | Coordinates (Angstroms) |           |           |
|---------------|---------------|-------------|-------------------------|-----------|-----------|
|               |               |             | X                       | Y         | Z         |
| 1             | 1             | 0           | 1.893686                | 1.180758  | -1.335865 |
| 2             | 6             | 0           | 1.003130                | 1.596686  | -0.871601 |
| 3             | 6             | 0           | -1.308908               | 2.678754  | 0.251801  |
| 4             | 6             | 0           | -0.074988               | 0.739014  | -0.554438 |
| 5             | 6             | 0           | 0.982301                | 2.935636  | -0.524242 |
| 6             | 6             | 0           | -0.121753               | 3.479782  | 0.209643  |
| 7             | 6             | 0           | -1.269163               | 1.340413  | -0.098814 |
| 8             | 1             | 0           | 1.870967                | 3.545519  | -0.668470 |
| 9             | 1             | 0           | -2.139845               | 0.718192  | 0.089809  |
| 10            | 1             | 0           | -2.199076               | 3.083187  | 0.727618  |
| 11            | 6             | 0           | 0.074988                | -0.739014 | -0.554438 |
| 12            | 6             | 0           | 0.121753                | -3.479782 | 0.209643  |
| 13            | 6             | 0           | 1.269163                | -1.340413 | -0.098814 |
| 14            | 6             | 0           | -1.003130               | -1.596686 | -0.871601 |
| 15            | 6             | 0           | -0.982301               | -2.935636 | -0.524242 |
| 16            | 6             | 0           | 1.308908                | -2.678754 | 0.251801  |
| 17            | 1             | 0           | 2.139845                | -0.718192 | 0.089809  |
| 18            | 1             | 0           | -1.893686               | -1.180758 | -1.335865 |
| 19            | 1             | 0           | -1.870967               | -3.545519 | -0.668470 |
| 20            | 1             | 0           | 2.199076                | -3.083187 | 0.727618  |
| 21            | 6             | 0           | -0.121753               | -4.400425 | 1.241462  |
| 22            | 1             | 0           | 0.666716                | -4.700760 | 1.924812  |
| 23            | 6             | 0           | 0.121753                | 4.400425  | 1.241462  |
| 24            | 1             | 0           | -0.666716               | 4.700760  | 1.924812  |
| 25            | 1             | 0           | 1.084151                | 4.893463  | 1.339232  |
| 26            | 1             | 0           | -1.084151               | -4.893463 | 1.339232  |

**S-DR1 at  $\theta = 29^\circ$  (C1-C2-C6 = C5-C9-C10 =  $135^\circ$ )**  
 Standard orientation:

| Center Number | Atomic Number | Atomic Type | Coordinates (Angstroms) |           |           |
|---------------|---------------|-------------|-------------------------|-----------|-----------|
|               |               |             | X                       | Y         | Z         |
| 1             | 1             | 0           | 2.168252                | 1.021188  | -0.897723 |
| 2             | 6             | 0           | 1.226460                | 1.483572  | -0.621083 |
| 3             | 6             | 0           | -1.233074               | 2.754373  | -0.156009 |
| 4             | 6             | 0           | -0.000054               | 0.698160  | -0.681039 |
| 5             | 6             | 0           | 1.232972                | 2.754499  | -0.156330 |
| 6             | 6             | 0           | -0.000013               | 3.355818  | 0.358491  |
| 7             | 6             | 0           | -1.226589               | 1.483442  | -0.620778 |
| 8             | 1             | 0           | 2.168754                | 3.295723  | -0.040214 |
| 9             | 1             | 0           | -2.168449               | 1.021017  | -0.897138 |
| 10            | 1             | 0           | -2.168876               | 3.295500  | -0.039588 |
| 11            | 6             | 0           | 0.000054                | -0.698160 | -0.681039 |
| 12            | 6             | 0           | 0.000013                | -3.355818 | 0.358491  |
| 13            | 6             | 0           | 1.226589                | -1.483442 | -0.620778 |
| 14            | 6             | 0           | -1.226460               | -1.483572 | -0.621083 |
| 15            | 6             | 0           | -1.232972               | -2.754499 | -0.156330 |
| 16            | 6             | 0           | 1.233074                | -2.754373 | -0.156009 |
| 17            | 1             | 0           | 2.168449                | -1.021017 | -0.897138 |
| 18            | 1             | 0           | -2.168252               | -1.021188 | -0.897723 |
| 19            | 1             | 0           | -2.168754               | -3.295723 | -0.040214 |
| 20            | 1             | 0           | 2.168876                | -3.295500 | -0.039588 |
| 21            | 6             | 0           | -0.000013               | -4.048669 | 1.522786  |
| 22            | 1             | 0           | 0.925908                | -4.359334 | 1.999256  |
| 23            | 6             | 0           | 0.000013                | 4.048669  | 1.522786  |
| 24            | 1             | 0           | -0.925908               | 4.359334  | 1.999256  |
| 25            | 1             | 0           | 0.925915                | 4.359511  | 1.999183  |
| 26            | 1             | 0           | -0.925915               | -4.359511 | 1.999183  |

**T-DR1 at  $\theta = 29^\circ$  (C1-C2-C6 = C5-C9-C10 =  $135^\circ$ )**  
 Standard orientation:

| Center Number | Atomic Number | Atomic Type | Coordinates (Angstroms) |           |           |
|---------------|---------------|-------------|-------------------------|-----------|-----------|
|               |               |             | X                       | Y         | Z         |
| 1             | 1             | 0           | 1.873128                | 1.214241  | -1.403194 |
| 2             | 6             | 0           | 0.983612                | 1.612251  | -0.921402 |
| 3             | 6             | 0           | -1.330169               | 2.649798  | 0.241298  |
| 4             | 6             | 0           | -0.084811               | 0.738371  | -0.612638 |
| 5             | 6             | 0           | 0.959509                | 2.939837  | -0.533951 |
| 6             | 6             | 0           | -0.136837               | 3.446998  | 0.241445  |
| 7             | 6             | 0           | -1.285163               | 1.323060  | -0.149657 |
| 8             | 1             | 0           | 1.846022                | 3.556608  | -0.661087 |
| 9             | 1             | 0           | -2.153666               | 0.692335  | 0.020098  |
| 10            | 1             | 0           | -2.220336               | 3.034918  | 0.732847  |
| 11            | 6             | 0           | 0.084811                | -0.738371 | -0.612638 |
| 12            | 6             | 0           | 0.136837                | -3.446998 | 0.241445  |
| 13            | 6             | 0           | 1.285163                | -1.323060 | -0.149657 |
| 14            | 6             | 0           | -0.983612               | -1.612251 | -0.921402 |
| 15            | 6             | 0           | -0.959509               | -2.939837 | -0.533951 |
| 16            | 6             | 0           | 1.330169                | -2.649798 | 0.241298  |
| 17            | 1             | 0           | 2.153666                | -0.692335 | 0.020098  |
| 18            | 1             | 0           | -1.873128               | -1.214241 | -1.403194 |
| 19            | 1             | 0           | -1.846022               | -3.556608 | -0.661087 |
| 20            | 1             | 0           | 2.220336                | -3.034918 | 0.732847  |
| 21            | 6             | 0           | -0.136837               | -4.249486 | 1.358681  |
| 22            | 1             | 0           | 0.639113                | -4.497994 | 2.076622  |
| 23            | 6             | 0           | 0.136837                | 4.249486  | 1.358681  |
| 24            | 1             | 0           | -0.639113               | 4.497994  | 2.076622  |
| 25            | 1             | 0           | 1.109123                | 4.714408  | 1.492056  |
| 26            | 1             | 0           | -1.109123               | -4.714408 | 1.492056  |

S-DR2 at  $\theta = 0^\circ$  (C1-C2-C6 = C8-C7-C12 =  $180^\circ$ )

Standard orientation:

| Center Number | Atomic Number | Atomic Type | Coordinates (Angstroms) |           |          |
|---------------|---------------|-------------|-------------------------|-----------|----------|
|               |               |             | X                       | Y         | Z        |
| 1             | 6             | 0           | 2.459561                | 0.790624  | 0.000000 |
| 2             | 1             | 0           | 1.132456                | 2.523908  | 0.000000 |
| 3             | 6             | 0           | 1.159491                | 1.435945  | 0.000000 |
| 4             | 6             | 0           | 1.310199                | -1.380133 | 0.000000 |
| 5             | 6             | 0           | -0.010893               | 0.732829  | 0.000000 |
| 6             | 6             | 0           | 2.459561                | -0.670278 | 0.000000 |
| 7             | 6             | 0           | 0.010893                | -0.732829 | 0.000000 |
| 8             | 6             | 0           | -1.310199               | 1.380133  | 0.000000 |
| 9             | 1             | 0           | 3.421271                | -1.177412 | 0.000000 |
| 10            | 1             | 0           | -1.132456               | -2.523908 | 0.000000 |
| 11            | 1             | 0           | 1.334335                | -2.467627 | 0.000000 |
| 12            | 6             | 0           | -2.459561               | 0.670278  | 0.000000 |
| 13            | 1             | 0           | -1.334335               | 2.467627  | 0.000000 |
| 14            | 1             | 0           | -3.421271               | 1.177412  | 0.000000 |
| 15            | 6             | 0           | -2.459561               | -0.790624 | 0.000000 |
| 16            | 6             | 0           | -1.159491               | -1.435945 | 0.000000 |
| 17            | 6             | 0           | 3.616365                | 1.503167  | 0.000000 |
| 18            | 1             | 0           | 4.585041                | 1.012437  | 0.000000 |
| 19            | 1             | 0           | 3.614174                | 2.589171  | 0.000000 |
| 20            | 6             | 0           | -3.616365               | -1.503167 | 0.000000 |
| 21            | 1             | 0           | -4.585041               | -1.012437 | 0.000000 |
| 22            | 1             | 0           | -3.614174               | -2.589171 | 0.000000 |

T-DR2 at  $\theta = 0^\circ$  (C1-C2-C6 = C8-C7-C12 =  $180^\circ$ )

Standard orientation:

| Center Number | Atomic Number | Atomic Type | Coordinates (Angstroms) |           |          |
|---------------|---------------|-------------|-------------------------|-----------|----------|
|               |               |             | X                       | Y         | Z        |
| 1             | 6             | 0           | 2.471428                | 0.718163  | 0.000000 |
| 2             | 1             | 0           | 1.242303                | 2.488396  | 0.000000 |
| 3             | 6             | 0           | 1.245648                | 1.400429  | 0.000000 |
| 4             | 6             | 0           | 1.245648                | -1.401908 | 0.000000 |
| 5             | 6             | 0           | 0.004617                | 0.714655  | 0.000000 |
| 6             | 6             | 0           | 2.432674                | -0.719413 | 0.000000 |
| 7             | 6             | 0           | -0.004617               | -0.714655 | 0.000000 |
| 8             | 6             | 0           | -1.245648               | 1.401908  | 0.000000 |
| 9             | 1             | 0           | 3.373935                | -1.263569 | 0.000000 |
| 10            | 1             | 0           | -1.242303               | -2.488396 | 0.000000 |
| 11            | 1             | 0           | 1.241130                | -2.489559 | 0.000000 |
| 12            | 6             | 0           | -2.432674               | 0.719413  | 0.000000 |
| 13            | 1             | 0           | -1.241130               | 2.489559  | 0.000000 |
| 14            | 1             | 0           | -3.373935               | 1.263569  | 0.000000 |
| 15            | 6             | 0           | -2.471428               | -0.718163 | 0.000000 |
| 16            | 6             | 0           | -1.245648               | -1.400429 | 0.000000 |
| 17            | 6             | 0           | 3.710892                | 1.410430  | 0.000000 |
| 18            | 1             | 0           | 4.653470                | 0.873486  | 0.000000 |
| 19            | 1             | 0           | 3.746319                | 2.494701  | 0.000000 |
| 20            | 6             | 0           | -3.710892               | -1.410430 | 0.000000 |
| 21            | 1             | 0           | -4.653470               | -0.873486 | 0.000000 |
| 22            | 1             | 0           | -3.746319               | -2.494701 | 0.000000 |

**S-DR2 at  $\theta = 12^\circ$  (C1-C2-C6 = C8-C7-C12 =  $160^\circ$ )**  
 Standard orientation:

| Center Number | Atomic Number | Atomic Type | Coordinates (Angstroms) |           |           |
|---------------|---------------|-------------|-------------------------|-----------|-----------|
|               |               |             | X                       | Y         | Z         |
| 1             | 6             | 0           | -1.824976               | 1.795778  | 0.055189  |
| 2             | 1             | 0           | 0.137776                | 2.755968  | -0.029838 |
| 3             | 6             | 0           | -0.378663               | 1.800008  | -0.090429 |
| 4             | 6             | 0           | -1.793722               | -0.633533 | -0.287775 |
| 5             | 6             | 0           | 0.342296                | 0.648826  | -0.223860 |
| 6             | 6             | 0           | -2.494751               | 0.514901  | -0.169688 |
| 7             | 6             | 0           | -0.342296               | -0.648826 | -0.223860 |
| 8             | 6             | 0           | 1.793722                | 0.633533  | -0.287775 |
| 9             | 1             | 0           | -3.581879               | 0.502470  | -0.173320 |
| 10            | 1             | 0           | -0.137776               | -2.755968 | -0.029838 |
| 11            | 1             | 0           | -2.308225               | -1.586110 | -0.393274 |
| 12            | 6             | 0           | 2.494751                | -0.514901 | -0.169688 |
| 13            | 1             | 0           | 2.308225                | 1.586110  | -0.393274 |
| 14            | 1             | 0           | 3.581879                | -0.502470 | -0.173320 |
| 15            | 6             | 0           | 1.824976                | -1.795778 | 0.055189  |
| 16            | 6             | 0           | 0.378663                | -1.800008 | -0.090429 |
| 17            | 6             | 0           | -2.494751               | 2.863013  | 0.561225  |
| 18            | 1             | 0           | -3.567486               | 2.832795  | 0.728320  |
| 19            | 1             | 0           | -1.985405               | 3.792082  | 0.800137  |
| 20            | 6             | 0           | 2.494751                | -2.863013 | 0.561225  |
| 21            | 1             | 0           | 3.567486                | -2.832795 | 0.728320  |
| 22            | 1             | 0           | 1.985405                | -3.792082 | 0.800137  |

**T-DR2 at  $\theta = 12^\circ$  (C1-C2-C6 = C8-C7-C12 =  $160^\circ$ )**  
 Standard orientation:

| Center Number | Atomic Number | Atomic Type | Coordinates (Angstroms) |           |           |
|---------------|---------------|-------------|-------------------------|-----------|-----------|
|               |               |             | X                       | Y         | Z         |
| 1             | 6             | 0           | -1.778425               | 1.838156  | 0.022459  |
| 2             | 1             | 0           | 0.169527                | 2.763895  | 0.013719  |
| 3             | 6             | 0           | -0.379279               | 1.830450  | -0.091343 |
| 4             | 6             | 0           | -1.778425               | -0.593602 | -0.261468 |
| 5             | 6             | 0           | 0.351400                | 0.622126  | -0.232055 |
| 6             | 6             | 0           | -2.465944               | 0.584990  | -0.149948 |
| 7             | 6             | 0           | -0.351400               | -0.622126 | -0.232055 |
| 8             | 6             | 0           | 1.778425                | 0.593602  | -0.261468 |
| 9             | 1             | 0           | -3.552689               | 0.580948  | -0.117861 |
| 10            | 1             | 0           | -0.169527               | -2.763895 | 0.013719  |
| 11            | 1             | 0           | -2.317324               | -1.536268 | -0.324586 |
| 12            | 6             | 0           | 2.465944                | -0.584990 | -0.149948 |
| 13            | 1             | 0           | 2.317324                | 1.536268  | -0.324586 |
| 14            | 1             | 0           | 3.552689                | -0.580948 | -0.117861 |
| 15            | 6             | 0           | 1.778425                | -1.838156 | 0.022459  |
| 16            | 6             | 0           | 0.379279                | -1.830450 | -0.091343 |
| 17            | 6             | 0           | -2.471652               | 2.963377  | 0.540698  |
| 18            | 1             | 0           | -3.544747               | 2.937354  | 0.698133  |
| 19            | 1             | 0           | -1.950991               | 3.889554  | 0.760541  |
| 20            | 6             | 0           | 2.471652                | -2.963377 | 0.540698  |
| 21            | 1             | 0           | 3.544747                | -2.937354 | 0.698133  |
| 22            | 1             | 0           | 1.950991                | -3.889554 | 0.760541  |

**S-DR2 at  $\theta = 17^\circ$  (C1-C2-C6 = C8-C7-C12 =  $140^\circ$ )**

Standard orientation:

| Center Number | Atomic Number | Atomic Type | Coordinates (Angstroms) |           |           |
|---------------|---------------|-------------|-------------------------|-----------|-----------|
|               |               |             | X                       | Y         | Z         |
| 1             | 6             | 0           | -1.858859               | 1.718219  | 0.086645  |
| 2             | 1             | 0           | 0.070236                | 2.750006  | -0.040774 |
| 3             | 6             | 0           | -0.420060               | 1.782712  | -0.129879 |
| 4             | 6             | 0           | -1.777068               | -0.676653 | -0.426028 |
| 5             | 6             | 0           | 0.325836                | 0.658214  | -0.329704 |
| 6             | 6             | 0           | -2.505280               | 0.446584  | -0.248470 |
| 7             | 6             | 0           | -0.325836               | -0.658214 | -0.329704 |
| 8             | 6             | 0           | 1.777068                | 0.676653  | -0.426028 |
| 9             | 1             | 0           | -3.591873               | 0.410563  | -0.256054 |
| 10            | 1             | 0           | -0.070236               | -2.750006 | -0.040774 |
| 11            | 1             | 0           | -2.266634               | -1.634645 | -0.586532 |
| 12            | 6             | 0           | 2.505280                | -0.446584 | -0.248470 |
| 13            | 1             | 0           | 2.266634                | 1.634645  | -0.586532 |
| 14            | 1             | 0           | 3.591873                | -0.410563 | -0.256054 |
| 15            | 6             | 0           | 1.858859                | -1.718219 | 0.086645  |
| 16            | 6             | 0           | 0.420060                | -1.782712 | -0.129879 |
| 17            | 6             | 0           | -2.505280               | 2.657646  | 0.822018  |
| 18            | 1             | 0           | -3.559387               | 2.561731  | 1.066039  |
| 19            | 1             | 0           | -1.999299               | 3.553732  | 1.169833  |
| 20            | 6             | 0           | 2.505280                | -2.657646 | 0.822018  |
| 21            | 1             | 0           | 3.559387                | -2.561731 | 1.066039  |
| 22            | 1             | 0           | 1.999299                | -3.553732 | 1.169833  |

**T-DR2 at  $\theta = 17^\circ$  (C1-C2-C6 = C8-C7-C12 =  $140^\circ$ )**

Standard orientation:

| Center Number | Atomic Number | Atomic Type | Coordinates (Angstroms) |           |           |
|---------------|---------------|-------------|-------------------------|-----------|-----------|
|               |               |             | X                       | Y         | Z         |
| 1             | 6             | 0           | -1.811127               | 1.777856  | 0.038351  |
| 2             | 1             | 0           | 0.115429                | 2.750992  | 0.023660  |
| 3             | 6             | 0           | -0.416858               | 1.815248  | -0.132892 |
| 4             | 6             | 0           | -1.764748               | -0.631620 | -0.387232 |
| 5             | 6             | 0           | 0.336707                | 0.630195  | -0.343834 |
| 6             | 6             | 0           | -2.476791               | 0.525347  | -0.219309 |
| 7             | 6             | 0           | -0.336707               | -0.630195 | -0.343834 |
| 8             | 6             | 0           | 1.764748                | 0.631620  | -0.387232 |
| 9             | 1             | 0           | -3.562611               | 0.494842  | -0.171711 |
| 10            | 1             | 0           | -0.115429               | -2.750992 | 0.023660  |
| 11            | 1             | 0           | -2.283356               | -1.582912 | -0.482842 |
| 12            | 6             | 0           | 2.476791                | -0.525347 | -0.219309 |
| 13            | 1             | 0           | 2.283356                | 1.582912  | -0.482842 |
| 14            | 1             | 0           | 3.562611                | -0.494842 | -0.171711 |
| 15            | 6             | 0           | 1.811127                | -1.777856 | 0.038351  |
| 16            | 6             | 0           | 0.416858                | -1.815248 | -0.132892 |
| 17            | 6             | 0           | -2.476791               | 2.778226  | 0.793596  |
| 18            | 1             | 0           | -3.533696               | 2.696033  | 1.024995  |
| 19            | 1             | 0           | -1.958056               | 3.675973  | 1.113810  |
| 20            | 6             | 0           | 2.476791                | -2.778226 | 0.793596  |
| 21            | 1             | 0           | 3.533696                | -2.696033 | 1.024995  |
| 22            | 1             | 0           | 1.958056                | -3.675973 | 1.113810  |

S-DR2  $\theta = 26^\circ$  (C1-C2-C6 = C8-C7-C12 =  $120^\circ$ )

Standard orientation:

| Center Number | Atomic Number | Atomic Type | Coordinates (Angstroms) |           |           |
|---------------|---------------|-------------|-------------------------|-----------|-----------|
|               |               |             | X                       | Y         | Z         |
| 1             | 6             | 0           | -1.908250               | 1.600672  | 0.122600  |
| 2             | 1             | 0           | -0.035720               | 2.739938  | -0.048371 |
| 3             | 6             | 0           | -0.484154               | 1.755204  | -0.162083 |
| 4             | 6             | 0           | -1.748811               | -0.743313 | -0.557770 |
| 5             | 6             | 0           | 0.299669                | 0.671937  | -0.426154 |
| 6             | 6             | 0           | -2.518239               | 0.340355  | -0.322112 |
| 7             | 6             | 0           | -0.299669               | -0.671937 | -0.426154 |
| 8             | 6             | 0           | 1.748811                | 0.743313  | -0.557770 |
| 9             | 1             | 0           | -3.602955               | 0.268798  | -0.338444 |
| 10            | 1             | 0           | 0.035720                | -2.739938 | -0.048371 |
| 11            | 1             | 0           | -2.199223               | -1.708724 | -0.777382 |
| 12            | 6             | 0           | 2.518239                | -0.340355 | -0.322112 |
| 13            | 1             | 0           | 2.199223                | 1.708724  | -0.777382 |
| 14            | 1             | 0           | 3.602955                | -0.268798 | -0.338444 |
| 15            | 6             | 0           | 1.908250                | -1.600672 | 0.122600  |
| 16            | 6             | 0           | 0.484154                | -1.755204 | -0.162083 |
| 17            | 6             | 0           | -2.518239               | 2.366755  | 1.059946  |
| 18            | 1             | 0           | -3.541810               | 2.177093  | 1.370980  |
| 19            | 1             | 0           | -2.019346               | 3.222264  | 1.506647  |
| 20            | 6             | 0           | 2.518239                | -2.366755 | 1.059946  |
| 21            | 1             | 0           | 3.541810                | -2.177093 | 1.370980  |
| 22            | 1             | 0           | 2.019346                | -3.222264 | 1.506647  |

T-DR2  $\theta = 26^\circ$  (C1-C2-C6 = C8-C7-C12 =  $120^\circ$ )

Standard orientation:

| Center Number | Atomic Number | Atomic Type | Coordinates (Angstroms) |           |           |
|---------------|---------------|-------------|-------------------------|-----------|-----------|
|               |               |             | X                       | Y         | Z         |
| 1             | 6             | 0           | -1.866711               | 1.677981  | 0.059061  |
| 2             | 1             | 0           | 0.019715                | 2.731789  | 0.037311  |
| 3             | 6             | 0           | -0.482449               | 1.789202  | -0.169358 |
| 4             | 6             | 0           | -1.738892               | -0.697854 | -0.506316 |
| 5             | 6             | 0           | 0.310873                | 0.643256  | -0.448963 |
| 6             | 6             | 0           | -2.492944               | 0.422206  | -0.282893 |
| 7             | 6             | 0           | -0.310873               | -0.643256 | -0.448963 |
| 8             | 6             | 0           | 1.738892                | 0.697854  | -0.506316 |
| 9             | 1             | 0           | -3.575939               | 0.346742  | -0.221400 |
| 10            | 1             | 0           | -0.019715               | -2.731789 | 0.037311  |
| 11            | 1             | 0           | -2.221337               | -1.664099 | -0.635546 |
| 12            | 6             | 0           | 2.492944                | -0.422206 | -0.282893 |
| 13            | 1             | 0           | 2.221337                | 1.664099  | -0.635546 |
| 14            | 1             | 0           | 3.575939                | -0.346742 | -0.221400 |
| 15            | 6             | 0           | 1.866711                | -1.677981 | 0.059061  |
| 16            | 6             | 0           | 0.482449                | -1.789202 | -0.169358 |
| 17            | 6             | 0           | -2.492944               | 2.506887  | 1.025167  |
| 18            | 1             | 0           | -3.523232               | 2.341219  | 1.323406  |
| 19            | 1             | 0           | -1.981616               | 3.371609  | 1.436040  |
| 20            | 6             | 0           | 2.492944                | -2.506887 | 1.025167  |
| 21            | 1             | 0           | 3.523232                | -2.341219 | 1.323406  |
| 22            | 1             | 0           | 1.981616                | -3.371609 | 1.436040  |



**S-DR3 at  $\theta = 0^\circ$  (C1-C5-C6 = C10-C6-C5 =  $180^\circ$ )**

Standard orientation:

| Center Number | Atomic Number | Atomic Type | Coordinates (Angstroms) |           |           |
|---------------|---------------|-------------|-------------------------|-----------|-----------|
|               |               |             | X                       | Y         | Z         |
| 1             | 6             | 0           | 0.000000                | 3.597497  | -0.268693 |
| 2             | 1             | 0           | 0.000000                | 3.333337  | 1.884037  |
| 3             | 6             | 0           | 0.000000                | 2.817047  | 0.926293  |
| 4             | 6             | 0           | 0.000000                | 1.499797  | -1.540514 |
| 5             | 6             | 0           | 0.000000                | 1.427412  | 0.912478  |
| 6             | 6             | 0           | 0.000000                | 2.863282  | -1.512371 |
| 7             | 6             | 0           | 0.000000                | 0.710946  | -0.341649 |
| 8             | 6             | 0           | 0.000000                | 0.677977  | 2.143982  |
| 9             | 1             | 0           | 0.000000                | 3.425624  | -2.442865 |
| 10            | 1             | 0           | 0.000000                | -1.003220 | -2.504765 |
| 11            | 1             | 0           | 0.000000                | 1.003220  | -2.504765 |
| 12            | 6             | 0           | 0.000000                | -0.677977 | 2.143982  |
| 13            | 1             | 0           | 0.000000                | 1.231857  | 3.079690  |
| 14            | 1             | 0           | 0.000000                | -1.231857 | 3.079690  |
| 15            | 6             | 0           | 0.000000                | -1.427412 | 0.912478  |
| 16            | 6             | 0           | 0.000000                | -2.817047 | 0.926293  |
| 17            | 6             | 0           | 0.000000                | -0.710946 | -0.341649 |
| 18            | 6             | 0           | 0.000000                | -3.597497 | -0.268693 |
| 19            | 1             | 0           | 0.000000                | -3.333337 | 1.884037  |
| 20            | 6             | 0           | 0.000000                | -2.863282 | -1.512371 |
| 21            | 1             | 0           | 0.000000                | -3.425624 | -2.442865 |
| 22            | 6             | 0           | 0.000000                | -1.499797 | -1.540514 |
| 23            | 6             | 0           | 0.000000                | 4.981919  | -0.244144 |
| 24            | 1             | 0           | 0.000000                | 5.530158  | 0.692763  |
| 25            | 6             | 0           | 0.000000                | -4.981919 | -0.244144 |
| 26            | 1             | 0           | 0.000000                | -5.562706 | -1.161142 |
| 27            | 1             | 0           | 0.000000                | 5.562706  | -1.161142 |
| 28            | 1             | 0           | 0.000000                | -5.530158 | 0.692763  |

**T-DR3 at  $\theta = 0^\circ$  (C1-C5-C6 = C10-C6-C5 =  $180^\circ$ )**

Standard orientation:

| Center Number | Atomic Number | Atomic Type | Coordinates (Angstroms) |           |           |
|---------------|---------------|-------------|-------------------------|-----------|-----------|
|               |               |             | X                       | Y         | Z         |
| 1             | 6             | 0           | 0.000000                | 3.599706  | -0.264149 |
| 2             | 1             | 0           | 0.000000                | 3.344568  | 1.879235  |
| 3             | 6             | 0           | 0.000000                | 2.833904  | 0.918546  |
| 4             | 6             | 0           | 0.000000                | 1.504520  | -1.532191 |
| 5             | 6             | 0           | 0.000000                | 1.425187  | 0.903165  |
| 6             | 6             | 0           | 0.000000                | 2.877152  | -1.501707 |
| 7             | 6             | 0           | 0.000000                | 0.726338  | -0.341809 |
| 8             | 6             | 0           | 0.000000                | 0.679799  | 2.131264  |
| 9             | 1             | 0           | 0.000000                | 3.438048  | -2.433059 |
| 10            | 1             | 0           | 0.000000                | -1.010232 | -2.497801 |
| 11            | 1             | 0           | 0.000000                | 1.010232  | -2.497801 |
| 12            | 6             | 0           | 0.000000                | -0.679799 | 2.131264  |
| 13            | 1             | 0           | 0.000000                | 1.231664  | 3.068183  |
| 14            | 1             | 0           | 0.000000                | -1.231664 | 3.068183  |
| 15            | 6             | 0           | 0.000000                | -1.425187 | 0.903165  |
| 16            | 6             | 0           | 0.000000                | -2.833904 | 0.918546  |
| 17            | 6             | 0           | 0.000000                | -0.726338 | -0.341809 |
| 18            | 6             | 0           | 0.000000                | -3.599706 | -0.264149 |
| 19            | 1             | 0           | 0.000000                | -3.344568 | 1.879235  |
| 20            | 6             | 0           | 0.000000                | -2.877152 | -1.501707 |
| 21            | 1             | 0           | 0.000000                | -3.438048 | -2.433059 |
| 22            | 6             | 0           | 0.000000                | -1.504520 | -1.532191 |
| 23            | 6             | 0           | 0.000000                | 5.011446  | -0.239408 |
| 24            | 1             | 0           | 0.000000                | 5.556070  | 0.698982  |
| 25            | 6             | 0           | 0.000000                | -5.011446 | -0.239408 |
| 26            | 1             | 0           | 0.000000                | -5.589013 | -1.157813 |

|    |   |   |          |           |           |
|----|---|---|----------|-----------|-----------|
| 27 | 1 | 0 | 0.000000 | 5.589013  | -1.157813 |
| 28 | 1 | 0 | 0.000000 | -5.556070 | 0.698982  |

S-DR3 at  $\theta = 17^\circ$  (C1-C5-C6 = C10-C6-C5 =  $160^\circ$ )

Standard orientation:

| Center Number | Atomic Number | Atomic Type | Coordinates (Angstroms) |           |           |
|---------------|---------------|-------------|-------------------------|-----------|-----------|
|               |               |             | X                       | Y         | Z         |
| 1             | 6             | 0           | -0.298494               | 0.320260  | 3.469717  |
| 2             | 1             | 0           | 1.862739                | 0.335086  | 3.249741  |
| 3             | 6             | 0           | 0.921890                | 0.107842  | 2.752851  |
| 4             | 6             | 0           | -1.505173               | -0.493006 | 1.495471  |
| 5             | 6             | 0           | 0.940112                | -0.266388 | 1.417897  |
| 6             | 6             | 0           | -1.511146               | -0.096717 | 2.798879  |
| 7             | 6             | 0           | -0.300348               | -0.496074 | 0.709766  |
| 8             | 6             | 0           | 2.179685                | -0.304987 | 0.677452  |
| 9             | 1             | 0           | -2.448340               | -0.045350 | 3.347525  |
| 10            | 1             | 0           | -2.448149               | -0.751614 | -1.025354 |
| 11            | 1             | 0           | -2.448149               | -0.751614 | 1.025354  |
| 12            | 6             | 0           | 2.179685                | -0.304987 | -0.677452 |
| 13            | 1             | 0           | 3.112907                | -0.256832 | 1.233374  |
| 14            | 1             | 0           | 3.112907                | -0.256832 | -1.233374 |
| 15            | 6             | 0           | 0.940112                | -0.266388 | -1.417897 |
| 16            | 6             | 0           | 0.921890                | 0.107842  | -2.752851 |
| 17            | 6             | 0           | -0.300348               | -0.496074 | -0.709766 |
| 18            | 6             | 0           | -0.298494               | 0.320260  | -3.469717 |
| 19            | 1             | 0           | 1.862739                | 0.335086  | -3.249741 |
| 20            | 6             | 0           | -1.511146               | -0.096717 | -2.798879 |
| 21            | 1             | 0           | -2.448340               | -0.045350 | -3.347525 |
| 22            | 6             | 0           | -1.505173               | -0.493006 | -1.495471 |
| 23            | 6             | 0           | -0.326950               | 0.947887  | 4.699182  |
| 24            | 1             | 0           | 0.585326                | 1.280139  | 5.184718  |
| 25            | 6             | 0           | -0.326950               | 0.947887  | -4.699182 |
| 26            | 1             | 0           | -1.261935               | 1.125673  | -5.221265 |
| 27            | 1             | 0           | -1.261935               | 1.125673  | 5.221265  |
| 28            | 1             | 0           | 0.585326                | 1.280139  | -5.184718 |

T-DR3 at  $\theta = 17^\circ$  (C1-C5-C6 = C10-C6-C5 =  $160^\circ$ )

Standard orientation:

| Center Number | Atomic Number | Atomic Type | Coordinates (Angstroms) |           |           |
|---------------|---------------|-------------|-------------------------|-----------|-----------|
|               |               |             | X                       | Y         | Z         |
| 1             | 6             | 0           | -0.291659               | 0.309165  | 3.476133  |
| 2             | 1             | 0           | 1.857049                | 0.336673  | 3.259145  |
| 3             | 6             | 0           | 0.912528                | 0.101890  | 2.772990  |
| 4             | 6             | 0           | -1.497099               | -0.484023 | 1.498091  |
| 5             | 6             | 0           | 0.928430                | -0.277387 | 1.416191  |
| 6             | 6             | 0           | -1.500446               | -0.083206 | 2.811174  |
| 7             | 6             | 0           | -0.299704               | -0.510618 | 0.728327  |
| 8             | 6             | 0           | 2.163883                | -0.290493 | 0.679471  |
| 9             | 1             | 0           | -2.441037               | -0.010675 | 3.351541  |
| 10            | 1             | 0           | -2.445511               | -0.718035 | -1.025789 |
| 11            | 1             | 0           | -2.445511               | -0.718035 | 1.025789  |
| 12            | 6             | 0           | 2.163883                | -0.290493 | -0.679471 |
| 13            | 1             | 0           | 3.097086                | -0.220644 | 1.233136  |
| 14            | 1             | 0           | 3.097086                | -0.220644 | -1.233136 |
| 15            | 6             | 0           | 0.928430                | -0.277387 | -1.416191 |
| 16            | 6             | 0           | 0.912528                | 0.101890  | -2.772990 |
| 17            | 6             | 0           | -0.299704               | -0.510618 | -0.728327 |
| 18            | 6             | 0           | -0.291659               | 0.309165  | -3.476133 |
| 19            | 1             | 0           | 1.857049                | 0.336673  | -3.259145 |
| 20            | 6             | 0           | -1.500446               | -0.083206 | -2.811174 |
| 21            | 1             | 0           | -2.441037               | -0.010675 | -3.351541 |

|    |   |   |           |           |           |
|----|---|---|-----------|-----------|-----------|
| 22 | 6 | 0 | -1.497099 | -0.484023 | -1.498091 |
| 23 | 6 | 0 | -0.317955 | 0.940723  | 4.737776  |
| 24 | 1 | 0 | 0.597794  | 1.260813  | 5.223724  |
| 25 | 6 | 0 | -0.317955 | 0.940723  | -4.737776 |
| 26 | 1 | 0 | -1.253248 | 1.115557  | -5.259194 |
| 27 | 1 | 0 | -1.253248 | 1.115557  | 5.259194  |
| 28 | 1 | 0 | 0.597794  | 1.260813  | -5.223724 |

S-DR3 at  $\theta = 34^\circ$  (C1-C5-C6 = C10-C6-C5 =  $140^\circ$ )

Standard orientation:

| Center Number | Atomic Number | Atomic Type | Coordinates (Angstroms) |           |           |
|---------------|---------------|-------------|-------------------------|-----------|-----------|
|               |               |             | X                       | Y         | Z         |
| 1             | 6             | 0           | -0.448217               | 0.573442  | 3.087839  |
| 2             | 1             | 0           | 1.721429                | 0.855526  | 3.009320  |
| 3             | 6             | 0           | 0.880381                | 0.336610  | 2.554170  |
| 4             | 6             | 0           | -1.306194               | -1.066256 | 1.481820  |
| 5             | 6             | 0           | 1.065060                | -0.360430 | 1.389868  |
| 6             | 6             | 0           | -1.485858               | -0.335757 | 2.607611  |
| 7             | 6             | 0           | -0.090900               | -0.925857 | 0.698329  |
| 8             | 6             | 0           | 2.334860                | -0.335552 | 0.675129  |
| 9             | 1             | 0           | -2.436856               | -0.358678 | 3.134042  |
| 10            | 1             | 0           | -2.119762               | -1.675873 | -1.100457 |
| 11            | 1             | 0           | -2.119762               | -1.675873 | 1.100457  |
| 12            | 6             | 0           | 2.334860                | -0.335552 | -0.675129 |
| 13            | 1             | 0           | 3.252150                | -0.190646 | 1.240462  |
| 14            | 1             | 0           | 3.252150                | -0.190646 | -1.240462 |
| 15            | 6             | 0           | 1.065060                | -0.360430 | -1.389868 |
| 16            | 6             | 0           | 0.880381                | 0.336610  | -2.554170 |
| 17            | 6             | 0           | -0.090900               | -0.925857 | -0.698329 |
| 18            | 6             | 0           | -0.448217               | 0.573442  | -3.087839 |
| 19            | 1             | 0           | 1.721429                | 0.855526  | -3.009320 |
| 20            | 6             | 0           | -1.485858               | -0.335757 | -2.607611 |
| 21            | 1             | 0           | -2.436856               | -0.358678 | -3.134042 |
| 22            | 6             | 0           | -1.306194               | -1.066256 | -1.481820 |
| 23            | 6             | 0           | -0.734262               | 1.645432  | 3.877557  |
| 24            | 1             | 0           | 0.038203                | 2.341883  | 4.189864  |
| 25            | 6             | 0           | -0.734262               | 1.645432  | -3.877557 |
| 26            | 1             | 0           | -1.744387               | 1.837984  | -4.226631 |
| 27            | 1             | 0           | -1.744387               | 1.837984  | 4.226631  |
| 28            | 1             | 0           | 0.038203                | 2.341883  | -4.189864 |

T-DR3 at  $\theta = 34^\circ$  (C1-C5-C6 = C10-C6-C5 =  $140^\circ$ )

Standard orientation:

| Center Number | Atomic Number | Atomic Type | Coordinates (Angstroms) |           |           |
|---------------|---------------|-------------|-------------------------|-----------|-----------|
|               |               |             | X                       | Y         | Z         |
| 1             | 6             | 0           | -0.428304               | 0.547981  | 3.114238  |
| 2             | 1             | 0           | 1.713400                | 0.845501  | 3.015162  |
| 3             | 6             | 0           | 0.864802                | 0.309776  | 2.595015  |
| 4             | 6             | 0           | -1.300985               | -1.038922 | 1.470606  |
| 5             | 6             | 0           | 1.047285                | -0.404661 | 1.393684  |
| 6             | 6             | 0           | -1.479556               | -0.292028 | 2.606820  |
| 7             | 6             | 0           | -0.078975               | -0.973755 | 0.734286  |
| 8             | 6             | 0           | 2.298565                | -0.300968 | 0.678700  |
| 9             | 1             | 0           | -2.456014               | -0.256136 | 3.083603  |
| 10            | 1             | 0           | -2.149620               | -1.577724 | -1.061056 |
| 11            | 1             | 0           | -2.149620               | -1.577724 | 1.061056  |
| 12            | 6             | 0           | 2.298565                | -0.300968 | -0.678700 |
| 13            | 1             | 0           | 3.205661                | -0.081298 | 1.236620  |
| 14            | 1             | 0           | 3.205661                | -0.081298 | -1.236620 |
| 15            | 6             | 0           | 1.047285                | -0.404661 | -1.393684 |
| 16            | 6             | 0           | 0.864802                | 0.309776  | -2.595015 |

|    |   |   |           |           |           |
|----|---|---|-----------|-----------|-----------|
| 17 | 6 | 0 | -0.078975 | -0.973755 | -0.734286 |
| 18 | 6 | 0 | -0.428304 | 0.547981  | -3.114238 |
| 19 | 1 | 0 | 1.713400  | 0.845501  | -3.015162 |
| 20 | 6 | 0 | -1.479556 | -0.292028 | -2.606820 |
| 21 | 1 | 0 | -2.456014 | -0.256136 | -3.083603 |
| 22 | 6 | 0 | -1.300985 | -1.038922 | -1.470606 |
| 23 | 6 | 0 | -0.704145 | 1.640533  | 3.958426  |
| 24 | 1 | 0 | 0.086005  | 2.304413  | 4.293647  |
| 25 | 6 | 0 | -0.704145 | 1.640533  | -3.958426 |
| 26 | 1 | 0 | -1.711553 | 1.837512  | -4.310322 |
| 27 | 1 | 0 | -1.711553 | 1.837512  | 4.310322  |
| 28 | 1 | 0 | 0.086005  | 2.304413  | -4.293647 |

S-DR3 at  $\theta = 52^\circ$  (C1-C5-C6 = C10-C6-C5 =  $120^\circ$ )

Standard orientation:

| Center Number | Atomic Number | Atomic Type | Coordinates (Angstroms) |           |           |
|---------------|---------------|-------------|-------------------------|-----------|-----------|
|               |               |             | X                       | Y         | Z         |
| 1             | 6             | 0           | 0.793823                | -0.566514 | 2.505069  |
| 2             | 1             | 0           | -1.142664               | -1.613449 | 2.618166  |
| 3             | 6             | 0           | -0.638380               | -0.725143 | 2.243875  |
| 4             | 6             | 0           | 0.686482                | 1.638903  | 1.463489  |
| 5             | 6             | 0           | -1.256131               | 0.085792  | 1.341423  |
| 6             | 6             | 0           | 1.305573                | 0.799954  | 2.320867  |
| 7             | 6             | 0           | -0.449214               | 1.130078  | 0.693521  |
| 8             | 6             | 0           | -2.513980               | -0.281962 | 0.673819  |
| 9             | 1             | 0           | 2.230039                | 1.085500  | 2.816845  |
| 10            | 1             | 0           | 1.104252                | 2.616159  | -1.237665 |
| 11            | 1             | 0           | 1.104252                | 2.616159  | 1.237665  |
| 12            | 6             | 0           | -2.513980               | -0.281962 | -0.673819 |
| 13            | 1             | 0           | -3.350537               | -0.662444 | 1.254184  |
| 14            | 1             | 0           | -3.350537               | -0.662444 | -1.254184 |
| 15            | 6             | 0           | -1.256131               | 0.085792  | -1.341423 |
| 16            | 6             | 0           | -0.638380               | -0.725143 | -2.243875 |
| 17            | 6             | 0           | -0.449214               | 1.130078  | -0.693521 |
| 18            | 6             | 0           | 0.793823                | -0.566514 | -2.505069 |
| 19            | 1             | 0           | -1.142664               | -1.613449 | -2.618166 |
| 20            | 6             | 0           | 1.305573                | 0.799954  | -2.320867 |
| 21            | 1             | 0           | 2.230039                | 1.085500  | -2.816845 |
| 22            | 6             | 0           | 0.686482                | 1.638903  | -1.463489 |
| 23            | 6             | 0           | 1.613135                | -1.628215 | 2.702405  |
| 24            | 1             | 0           | 1.224678                | -2.640558 | 2.766520  |
| 25            | 6             | 0           | 1.613135                | -1.628215 | -2.702405 |
| 26            | 1             | 0           | 2.686379                | -1.502566 | -2.812862 |
| 27            | 1             | 0           | 2.686379                | -1.502566 | 2.812862  |
| 28            | 1             | 0           | 1.224678                | -2.640558 | -2.766520 |

T-DR3 at  $\theta = 52^\circ$  (C1-C5-C6 = C10-C6-C5 =  $120^\circ$ )

Standard orientation:

| Center Number | Atomic Number | Atomic Type | Coordinates (Angstroms) |           |           |
|---------------|---------------|-------------|-------------------------|-----------|-----------|
|               |               |             | X                       | Y         | Z         |
| 1             | 6             | 0           | -0.769382               | 0.540372  | 2.552207  |
| 2             | 1             | 0           | 1.131139                | 1.591545  | 2.626575  |
| 3             | 6             | 0           | 0.623213                | 0.684386  | 2.306291  |
| 4             | 6             | 0           | -0.669841               | -1.621827 | 1.424325  |
| 5             | 6             | 0           | 1.258857                | -0.143494 | 1.359243  |
| 6             | 6             | 0           | -1.312514               | -0.770951 | 2.282294  |
| 7             | 6             | 0           | 0.518661                | -1.188245 | 0.746601  |
| 8             | 6             | 0           | 2.446920                | 0.352845  | 0.676648  |
| 9             | 1             | 0           | -2.297111               | -1.025276 | 2.667115  |
| 10            | 1             | 0           | -1.164416               | -2.539321 | -1.119274 |
| 11            | 1             | 0           | -1.164416               | -2.539321 | 1.119274  |

|    |   |   |           |           |           |
|----|---|---|-----------|-----------|-----------|
| 12 | 6 | 0 | 2.446920  | 0.352845  | -0.676648 |
| 13 | 1 | 0 | 3.221701  | 0.862024  | 1.244675  |
| 14 | 1 | 0 | 3.221701  | 0.862024  | -1.244675 |
| 15 | 6 | 0 | 1.258857  | -0.143494 | -1.359243 |
| 16 | 6 | 0 | 0.623213  | 0.684386  | -2.306291 |
| 17 | 6 | 0 | 0.518661  | -1.188245 | -0.746601 |
| 18 | 6 | 0 | -0.769382 | 0.540372  | -2.552207 |
| 19 | 1 | 0 | 1.131139  | 1.591545  | -2.626575 |
| 20 | 6 | 0 | -1.312514 | -0.770951 | -2.282294 |
| 21 | 1 | 0 | -2.297111 | -1.025276 | -2.667115 |
| 22 | 6 | 0 | -0.669841 | -1.621827 | -1.424325 |
| 23 | 6 | 0 | -1.600425 | 1.639587  | 2.807789  |
| 24 | 1 | 0 | -1.191131 | 2.637511  | 2.927680  |
| 25 | 6 | 0 | -1.600425 | 1.639587  | -2.807789 |
| 26 | 1 | 0 | -2.673108 | 1.517484  | -2.918492 |
| 27 | 1 | 0 | -2.673108 | 1.517484  | 2.918492  |
| 28 | 1 | 0 | -1.191131 | 2.637511  | -2.927680 |

S-DR4 at  $\theta = 0^\circ$  (C1-C5-C6 = C10-C13-C14 =  $180^\circ$ )

Standard orientation:

| Center Number | Atomic Number | Atomic Type | Coordinates (Angstroms) |           |          |
|---------------|---------------|-------------|-------------------------|-----------|----------|
|               |               |             | X                       | Y         | Z        |
| 1             | 6             | 0           | 3.720393                | 0.654859  | 0.000000 |
| 2             | 1             | 0           | 2.490364                | 2.445770  | 0.000000 |
| 3             | 6             | 0           | 2.471114                | 1.357894  | 0.000000 |
| 4             | 6             | 0           | 2.471114                | -1.458491 | 0.000000 |
| 5             | 6             | 0           | 1.246652                | 0.703023  | 0.000000 |
| 6             | 6             | 0           | 3.655838                | -0.799881 | 0.000000 |
| 7             | 6             | 0           | 1.210869                | -0.753004 | 0.000000 |
| 8             | 6             | 0           | 0.003970                | 1.405797  | 0.000000 |
| 9             | 1             | 0           | 4.592643                | -1.351521 | 0.000000 |
| 10            | 1             | 0           | -0.025989               | -2.493953 | 0.000000 |
| 11            | 1             | 0           | 2.446399                | -2.545934 | 0.000000 |
| 12            | 6             | 0           | -1.210869               | 0.753004  | 0.000000 |
| 13            | 1             | 0           | 0.025989                | 2.493953  | 0.000000 |
| 14            | 6             | 0           | -2.471114               | 1.458491  | 0.000000 |
| 15            | 6             | 0           | -1.246652               | -0.703023 | 0.000000 |
| 16            | 1             | 0           | -2.490364               | -2.445770 | 0.000000 |
| 17            | 6             | 0           | -0.003970               | -1.405797 | 0.000000 |
| 18            | 6             | 0           | -3.655838               | 0.799881  | 0.000000 |
| 19            | 1             | 0           | -2.446399               | 2.545934  | 0.000000 |
| 20            | 1             | 0           | -4.592643               | 1.351521  | 0.000000 |
| 21            | 6             | 0           | -3.720393               | -0.654859 | 0.000000 |
| 22            | 6             | 0           | -2.471114               | -1.357894 | 0.000000 |
| 23            | 6             | 0           | 4.927078                | 1.314302  | 0.000000 |
| 24            | 1             | 0           | 5.867910                | 0.772648  | 0.000000 |
| 25            | 6             | 0           | -4.927078               | -1.314302 | 0.000000 |
| 26            | 1             | 0           | -5.867910               | -0.772648 | 0.000000 |
| 27            | 1             | 0           | 4.979279                | 2.398755  | 0.000000 |
| 28            | 1             | 0           | -4.979279               | -2.398755 | 0.000000 |

T-DR4 at  $\theta = 0^\circ$  (C1-C5-C6 = C10-C13-C14 =  $180^\circ$ )

Standard orientation:

| Center Number | Atomic Number | Atomic Type | Coordinates (Angstroms) |           |          |
|---------------|---------------|-------------|-------------------------|-----------|----------|
|               |               |             | X                       | Y         | Z        |
| 1             | 6             | 0           | 3.706485                | 0.711115  | 0.000000 |
| 2             | 1             | 0           | 2.481459                | 2.485746  | 0.000000 |
| 3             | 6             | 0           | 2.480770                | 1.397975  | 0.000000 |
| 4             | 6             | 0           | 2.480770                | -1.414349 | 0.000000 |
| 5             | 6             | 0           | 1.229755                | 0.716833  | 0.000000 |

|    |   |   |           |           |          |
|----|---|---|-----------|-----------|----------|
| 6  | 6 | 0 | 3.661266  | -0.737949 | 0.000000 |
| 7  | 6 | 0 | 1.220136  | -0.724910 | 0.000000 |
| 8  | 6 | 0 | 0.003218  | 1.401925  | 0.000000 |
| 9  | 1 | 0 | 4.603089  | -1.281082 | 0.000000 |
| 10 | 1 | 0 | -0.006460 | -2.490240 | 0.000000 |
| 11 | 1 | 0 | 2.472071  | -2.501991 | 0.000000 |
| 12 | 6 | 0 | -1.220136 | 0.724910  | 0.000000 |
| 13 | 1 | 0 | 0.006460  | 2.490240  | 0.000000 |
| 14 | 6 | 0 | -2.480770 | 1.414349  | 0.000000 |
| 15 | 6 | 0 | -1.229755 | -0.716833 | 0.000000 |
| 16 | 1 | 0 | -2.481459 | -2.485746 | 0.000000 |
| 17 | 6 | 0 | -0.003218 | -1.401925 | 0.000000 |
| 18 | 6 | 0 | -3.661266 | 0.737949  | 0.000000 |
| 19 | 1 | 0 | -2.472071 | 2.501991  | 0.000000 |
| 20 | 1 | 0 | -4.603089 | 1.281082  | 0.000000 |
| 21 | 6 | 0 | -3.706485 | -0.711115 | 0.000000 |
| 22 | 6 | 0 | -2.480770 | -1.397975 | 0.000000 |
| 23 | 6 | 0 | 4.937786  | 1.388908  | 0.000000 |
| 24 | 1 | 0 | 5.878165  | 0.847687  | 0.000000 |
| 25 | 6 | 0 | -4.937786 | -1.388908 | 0.000000 |
| 26 | 1 | 0 | -5.878165 | -0.847687 | 0.000000 |
| 27 | 1 | 0 | 4.981496  | 2.473133  | 0.000000 |
| 28 | 1 | 0 | -4.981496 | -2.473133 | 0.000000 |

S-DR4 at  $\theta = 12^\circ$  (C1-C5-C6 = C10-C13-C14 =  $160^\circ$ )  
Standard orientation:

| Center Number | Atomic Number | Atomic Type | Coordinates (Angstroms) |           |           |
|---------------|---------------|-------------|-------------------------|-----------|-----------|
|               |               |             | X                       | Y         | Z         |
| 1             | 6             | 0           | 0.086707                | 3.709270  | 0.258569  |
| 2             | 1             | 0           | 2.041075                | 2.755041  | 0.232197  |
| 3             | 6             | 0           | 0.977646                | 2.599388  | 0.062643  |
| 4             | 6             | 0           | -1.785705               | 2.248833  | -0.363010 |
| 5             | 6             | 0           | 0.519590                | 1.326268  | -0.235417 |
| 6             | 6             | 0           | -1.318618               | 3.482762  | -0.054445 |
| 7             | 6             | 0           | -0.913089               | 1.095090  | -0.387367 |
| 8             | 6             | 0           | 1.391481                | 0.193503  | -0.291147 |
| 9             | 1             | 0           | -1.998129               | 4.329186  | 0.007261  |
| 10            | 1             | 0           | -2.465627               | -0.366756 | -0.263099 |
| 11            | 1             | 0           | -2.846650               | 2.091379  | -0.543990 |
| 12            | 6             | 0           | 0.913089                | -1.095090 | -0.387367 |
| 13            | 1             | 0           | 2.465627                | 0.366756  | -0.263099 |
| 14            | 6             | 0           | 1.785705                | -2.248833 | -0.363010 |
| 15            | 6             | 0           | -0.519590               | -1.326268 | -0.235417 |
| 16            | 1             | 0           | -2.041075               | -2.755041 | 0.232197  |
| 17            | 6             | 0           | -1.391481               | -0.193503 | -0.291147 |
| 18            | 6             | 0           | 1.318618                | -3.482762 | -0.054445 |
| 19            | 1             | 0           | 2.846650                | -2.091379 | -0.543990 |
| 20            | 1             | 0           | 1.998129                | -4.329186 | 0.007261  |
| 21            | 6             | 0           | -0.086707               | -3.709270 | 0.258569  |
| 22            | 6             | 0           | -0.977646               | -2.599388 | 0.062643  |
| 23            | 6             | 0           | 0.519590                | 4.904328  | 0.775483  |
| 24            | 1             | 0           | -0.164916               | 5.730466  | 0.941577  |
| 25            | 6             | 0           | -0.519590               | -4.904328 | 0.775483  |
| 26            | 1             | 0           | 0.164916                | -5.730466 | 0.941577  |
| 27            | 1             | 0           | 1.561821                | 5.064362  | 1.034188  |
| 28            | 1             | 0           | -1.561821               | -5.064362 | 1.034188  |

**T-DR4 at  $\theta = 12^\circ$  (C1-C5-C6 = C10-C13-C14 =  $160^\circ$ )**

Standard orientation:

| Center Number | Atomic Number | Atomic Type | Coordinates (Angstroms) |           |           |
|---------------|---------------|-------------|-------------------------|-----------|-----------|
|               |               |             | X                       | Y         | Z         |
| 1             | 6             | 0           | 0.081455                | 3.706958  | 0.249689  |
| 2             | 1             | 0           | 2.034651                | 2.792532  | 0.206774  |
| 3             | 6             | 0           | 0.970266                | 2.637576  | 0.044499  |
| 4             | 6             | 0           | -1.786274               | 2.229143  | -0.339152 |
| 5             | 6             | 0           | 0.511484                | 1.322058  | -0.254271 |
| 6             | 6             | 0           | -1.322345               | 3.469861  | -0.029168 |
| 7             | 6             | 0           | -0.905743               | 1.092407  | -0.391940 |
| 8             | 6             | 0           | 1.382183                | 0.219274  | -0.289177 |
| 9             | 1             | 0           | -2.011599               | 4.306310  | 0.056287  |
| 10            | 1             | 0           | -2.455176               | -0.391113 | -0.230989 |
| 11            | 1             | 0           | -2.850417               | 2.064434  | -0.492539 |
| 12            | 6             | 0           | 0.905743                | -1.092407 | -0.391940 |
| 13            | 1             | 0           | 2.455176                | 0.391113  | -0.230989 |
| 14            | 6             | 0           | 1.786274                | -2.229143 | -0.339152 |
| 15            | 6             | 0           | -0.511484               | -1.322058 | -0.254271 |
| 16            | 1             | 0           | -2.034651               | -2.792532 | 0.206774  |
| 17            | 6             | 0           | -1.382183               | -0.219274 | -0.289177 |
| 18            | 6             | 0           | 1.322345                | -3.469861 | -0.029168 |
| 19            | 1             | 0           | 2.850417                | -2.064434 | -0.492539 |
| 20            | 1             | 0           | 2.011599                | -4.306310 | 0.056287  |
| 21            | 6             | 0           | -0.081455               | -3.706958 | 0.249689  |
| 22            | 6             | 0           | -0.970266               | -2.637576 | 0.044499  |
| 23            | 6             | 0           | 0.511484                | 4.941667  | 0.764053  |
| 24            | 1             | 0           | -0.186406               | 5.755146  | 0.932908  |
| 25            | 6             | 0           | -0.511484               | -4.941667 | 0.764053  |
| 26            | 1             | 0           | 0.186406                | -5.755146 | 0.932908  |
| 27            | 1             | 0           | 1.555760                | 5.118067  | 1.000361  |
| 28            | 1             | 0           | -1.555760               | -5.118067 | 1.000361  |

**S-DR4 at  $\theta = 24^\circ$  (C1-C5-C6 = C10-C13-C14 =  $140^\circ$ )**

Standard orientation:

| Center Number | Atomic Number | Atomic Type | Coordinates (Angstroms) |           |           |
|---------------|---------------|-------------|-------------------------|-----------|-----------|
|               |               |             | X                       | Y         | Z         |
| 1             | 6             | 0           | 0.286225                | 3.495835  | 0.516746  |
| 2             | 1             | 0           | 2.177837                | 2.399324  | 0.484781  |
| 3             | 6             | 0           | 1.141848                | 2.381980  | 0.152355  |
| 4             | 6             | 0           | -1.544061               | 2.427216  | -0.717471 |
| 5             | 6             | 0           | 0.640028                | 1.250004  | -0.435930 |
| 6             | 6             | 0           | -1.036031               | 3.522958  | -0.111900 |
| 7             | 6             | 0           | -0.796048               | 1.177664  | -0.744875 |
| 8             | 6             | 0           | 1.407840                | 0.034548  | -0.564906 |
| 9             | 1             | 0           | -1.631041               | 4.427704  | -0.013540 |
| 10            | 1             | 0           | -2.493699               | -0.101458 | -0.534384 |
| 11            | 1             | 0           | -2.560343               | 2.428498  | -1.104879 |
| 12            | 6             | 0           | 0.796048                | -1.177664 | -0.744875 |
| 13            | 1             | 0           | 2.493699                | 0.101458  | -0.534384 |
| 14            | 6             | 0           | 1.544061                | -2.427216 | -0.717471 |
| 15            | 6             | 0           | -0.640028               | -1.250004 | -0.435930 |
| 16            | 1             | 0           | -2.177837               | -2.399324 | 0.484781  |
| 17            | 6             | 0           | -1.407840               | -0.034548 | -0.564906 |
| 18            | 6             | 0           | 1.036031                | -3.522958 | -0.111900 |
| 19            | 1             | 0           | 2.560343                | -2.428498 | -1.104879 |
| 20            | 1             | 0           | 1.631041                | -4.427704 | -0.013540 |
| 21            | 6             | 0           | -0.286225               | -3.495835 | 0.516746  |
| 22            | 6             | 0           | -1.141848               | -2.381980 | 0.152355  |
| 23            | 6             | 0           | 0.640028                | 4.393504  | 1.475845  |
| 24            | 1             | 0           | -0.027347               | 5.196596  | 1.773955  |
| 25            | 6             | 0           | -0.640028               | -4.393504 | 1.475845  |

|    |   |   |           |           |          |
|----|---|---|-----------|-----------|----------|
| 26 | 1 | 0 | 0.027347  | -5.196596 | 1.773955 |
| 27 | 1 | 0 | 1.603035  | 4.340287  | 1.974875 |
| 28 | 1 | 0 | -1.603035 | -4.340287 | 1.974875 |

T-DR4 at  $\theta = 24^\circ$  (C1-C5-C6 = C10-C13-C14 =  $140^\circ$ )

Standard orientation:

| Center Number | Atomic Number | Atomic Type | Coordinates (Angstroms) |           |           |
|---------------|---------------|-------------|-------------------------|-----------|-----------|
|               |               |             | X                       | Y         | Z         |
| 1             | 6             | 0           | 0.243315                | 3.505693  | 0.489377  |
| 2             | 1             | 0           | 2.148722                | 2.490954  | 0.413206  |
| 3             | 6             | 0           | 1.107298                | 2.464070  | 0.099767  |
| 4             | 6             | 0           | -1.601889               | 2.364200  | -0.652379 |
| 5             | 6             | 0           | 0.607760                | 1.264073  | -0.487456 |
| 6             | 6             | 0           | -1.107298               | 3.476171  | -0.046877 |
| 7             | 6             | 0           | -0.807588               | 1.162080  | -0.757108 |
| 8             | 6             | 0           | 1.390748                | 0.096854  | -0.553878 |
| 9             | 1             | 0           | -1.745050               | 4.341814  | 0.115341  |
| 10            | 1             | 0           | -2.469737               | -0.172739 | -0.436520 |
| 11            | 1             | 0           | -2.644201               | 2.325756  | -0.960925 |
| 12            | 6             | 0           | 0.807588                | -1.162080 | -0.757108 |
| 13            | 1             | 0           | 2.469737                | 0.172739  | -0.436520 |
| 14            | 6             | 0           | 1.601889                | -2.364200 | -0.652379 |
| 15            | 6             | 0           | -0.607760               | -1.264073 | -0.487456 |
| 16            | 1             | 0           | -2.148722               | -2.490954 | 0.413206  |
| 17            | 6             | 0           | -1.390748               | -0.096854 | -0.553878 |
| 18            | 6             | 0           | 1.107298                | -3.476171 | -0.046877 |
| 19            | 1             | 0           | 2.644201                | -2.325756 | -0.960925 |
| 20            | 1             | 0           | 1.745050                | -4.341814 | 0.115341  |
| 21            | 6             | 0           | -0.243315               | -3.505693 | 0.489377  |
| 22            | 6             | 0           | -1.107298               | -2.464070 | 0.099767  |
| 23            | 6             | 0           | 0.614469                | 4.462341  | 1.445630  |
| 24            | 1             | 0           | -0.073358               | 5.241069  | 1.758729  |
| 25            | 6             | 0           | -0.614469               | -4.462341 | 1.445630  |
| 26            | 1             | 0           | 0.073358                | -5.241069 | 1.758729  |
| 27            | 1             | 0           | 1.605481                | 4.458948  | 1.887710  |
| 28            | 1             | 0           | -1.605481               | -4.458948 | 1.887710  |

S-DR4 at  $\theta = 35^\circ$  (C1-C5-C6 = C10-C13-C14 =  $120^\circ$ )

Standard orientation:

| Center Number | Atomic Number | Atomic Type | Coordinates (Angstroms) |           |           |
|---------------|---------------|-------------|-------------------------|-----------|-----------|
|               |               |             | X                       | Y         | Z         |
| 1             | 6             | 0           | 0.373659                | 3.163706  | 0.743594  |
| 2             | 1             | 0           | 2.207121                | 1.951821  | 0.736539  |
| 3             | 6             | 0           | 1.239135                | 2.091723  | 0.259602  |
| 4             | 6             | 0           | -1.239135               | 2.596405  | -1.005618 |
| 5             | 6             | 0           | 0.757193                | 1.140189  | -0.591403 |
| 6             | 6             | 0           | -0.755995               | 3.505280  | -0.133961 |
| 7             | 6             | 0           | -0.649555               | 1.253677  | -1.044004 |
| 8             | 6             | 0           | 1.405660                | -0.143819 | -0.787651 |
| 9             | 1             | 0           | -1.243000               | 4.468603  | -0.002108 |
| 10            | 1             | 0           | -2.492008               | 0.199043  | -0.753783 |
| 11            | 1             | 0           | -2.134735               | 2.797086  | -1.588824 |
| 12            | 6             | 0           | 0.649555                | -1.253677 | -1.044004 |
| 13            | 1             | 0           | 2.492008                | -0.199043 | -0.753783 |
| 14            | 6             | 0           | 1.239135                | -2.596405 | -1.005618 |
| 15            | 6             | 0           | -0.757193               | -1.140189 | -0.591403 |
| 16            | 1             | 0           | -2.207121               | -1.951821 | 0.736539  |
| 17            | 6             | 0           | -1.405660               | 0.143819  | -0.787651 |
| 18            | 6             | 0           | 0.755995                | -3.505280 | -0.133961 |
| 19            | 1             | 0           | 2.134735                | -2.797086 | -1.588824 |
| 20            | 1             | 0           | 1.243000                | -4.468603 | -0.002108 |
| 21            | 6             | 0           | -0.373659               | -3.163706 | 0.743594  |



|    |   |   |           |           |          |
|----|---|---|-----------|-----------|----------|
| 22 | 6 | 0 | -1.239135 | -2.091723 | 0.259602 |
| 23 | 6 | 0 | 0.499740  | 3.681707  | 1.990614 |
| 24 | 1 | 0 | -0.192287 | 4.429785  | 2.366401 |
| 25 | 6 | 0 | -0.499740 | -3.681707 | 1.990614 |
| 26 | 1 | 0 | 0.192287  | -4.429785 | 2.366401 |
| 27 | 1 | 0 | 1.301948  | 3.373304  | 2.654734 |
| 28 | 1 | 0 | -1.301948 | -3.373304 | 2.654734 |

T-DR4 at  $\theta = 35^\circ$  (C1-C5-C6 = C10-C13-C14 =  $120^\circ$ )

Standard orientation:

| Center<br>Number | Atomic<br>Number | Atomic<br>Type | Coordinates (Angstroms) |           |           |
|------------------|------------------|----------------|-------------------------|-----------|-----------|
|                  |                  |                | X                       | Y         | Z         |
| 1                | 6                | 0              | 0.312424                | 3.190236  | 0.707525  |
| 2                | 1                | 0              | 2.181829                | 2.100000  | 0.614460  |
| 3                | 6                | 0              | 1.195562                | 2.224769  | 0.172364  |
| 4                | 6                | 0              | -1.384625               | 2.497294  | -0.915895 |
| 5                | 6                | 0              | 0.704692                | 1.187719  | -0.679391 |
| 6                | 6                | 0              | -0.916030               | 3.425022  | -0.043688 |
| 7                | 6                | 0              | -0.688936               | 1.229132  | -1.068749 |
| 8                | 6                | 0              | 1.384625                | -0.043895 | -0.769910 |
| 9                | 1                | 0              | -1.499481               | 4.314929  | 0.180960  |
| 10               | 1                | 0              | -2.456996               | 0.079786  | -0.592393 |
| 11               | 1                | 0              | -2.360310               | 2.620914  | -1.380384 |
| 12               | 6                | 0              | 0.688936                | -1.229132 | -1.068749 |
| 13               | 1                | 0              | 2.456996                | -0.079786 | -0.592393 |
| 14               | 6                | 0              | 1.384625                | -2.497294 | -0.915895 |
| 15               | 6                | 0              | -0.704692               | -1.187719 | -0.679391 |
| 16               | 1                | 0              | -2.181829               | -2.100000 | 0.614460  |
| 17               | 6                | 0              | -1.384625               | 0.043895  | -0.769910 |
| 18               | 6                | 0              | 0.916030                | -3.425022 | -0.043688 |
| 19               | 1                | 0              | 2.360310                | -2.620914 | -1.380384 |
| 20               | 1                | 0              | 1.499481                | -4.314929 | 0.180960  |
| 21               | 6                | 0              | -0.312424               | -3.190236 | 0.707525  |
| 22               | 6                | 0              | -1.195562               | -2.224769 | 0.172364  |
| 23               | 6                | 0              | 0.503443                | 3.759382  | 1.969858  |
| 24               | 1                | 0              | -0.210345               | 4.465162  | 2.382681  |
| 25               | 6                | 0              | -0.503443               | -3.759382 | 1.969858  |
| 26               | 1                | 0              | 0.210345                | -4.465162 | 2.382681  |
| 27               | 1                | 0              | 1.383723                | 3.530531  | 2.561987  |
| 28               | 1                | 0              | -1.383723               | -3.530531 | 2.561987  |
